# Supplementary material for: Tunable solid state emission of novel V-shaped fluorophores by subtle structure modification: polymorphism, mechanofluoro-chromism and micro-fabrication
Source: Royal Society of Chemistry journal article supplement (doi:10.1039/c7ra10432d), 2017-01-01

## Electronic Supporting Information (ESI)

### Tunable solid state emission of novel V-shaped fluorophores by subtle structure modification: polymorphism, mechanofluorochromism and micro-fabrication

Hong-Yu Fu, Xiao-Jing Liu and Min Xia\*

Department of Chemistry, Zhejiang Sci-Tech University, Hangzhou 310018, P. R. China  
E-mail: [xiamin@zstu.edu.cn](mailto:xiamin@zstu.edu.cn)

#### Materials and instruments

All the reagents were analytically pure and some chemicals were further purified by recrystallization or distillation. Melting points were determined by an OptiMelt automated melting point system. The  $^1\text{H}$  NMR (400 MHz) and  $^{13}\text{C}$  NMR (100 MHz) spectra were obtained on a Bruker Avance II DMX 400 spectrometer with  $\text{CDCl}_3$  or  $\text{DMSO-d}_6$  as the solvent. The absorption spectra were measured on a Shimadzu UV 2501(PC)S UV-Vis spectrometer, and the fluorescence spectra were acquired on a Perkin-Elmer LS55 spectrophotometer. The quantum yields were measured with quinine sulfate in 0.1 M sulfuric acid solution ( $\Phi_f=0.55$ ) as the reference and the solid-state quantum yields were gained by an integral sphere. The mass spectrum was recorded on a HP 1110 mass spectrometer. The crystallographic data were determined on a Bruker Gemini Ultra diffractometer with a CCD counter. The powder X-ray diffraction patterns were recorded on DX2700 with  $\text{Cu-K}\alpha$  radiation operating at 40 kV and 40 mA by a  $0.3^\circ/\text{min}$  scanning rate. Dynamic light scattering is carried out on a Beckman Coulter particle analyzer with 50  $\mu\text{M}$  aggregate in MeCN/ $\text{H}_2\text{O}$  mixture (5 : 95, v/v) at 25  $^\circ\text{C}$ .

#### Synthetic procedures

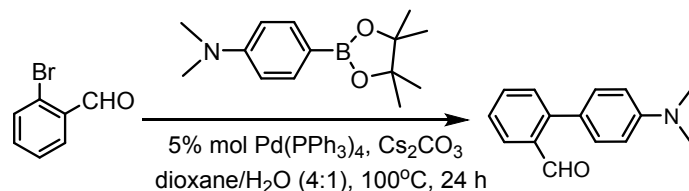

At room temperature and  $\text{N}_2$  flux, the solution of *N,N*-dimethyl-4-(4,4,5,5-tetramethyl-1,3,2-dioxaborolan-2-yl)aniline (12 mmol, 2.95 g) in dioxane/ $\text{H}_2\text{O}$  (4:1, v/v, 20 mL) was injected into the mixture of 2-bromobenzaldehyde (10 mmol, 1.83 g),  $\text{Pd}(\text{PPh}_3)_4$  (0.5 mmol, 0.577 g) and  $\text{CsCO}_3$  (15 mmol, 2.89 g) in dioxane/ $\text{H}_2\text{O}$  (4:1, v/v, 30 mL). The resulted mixture was heated at 100 $^\circ\text{C}$  for 24 h and then cooled to room temperature. After filtration, the filtrate was diluted with water and extracted by  $\text{CH}_2\text{Cl}_2$  (2 $\times$ 15 mL). The combined organic layers were dried over anhydrous  $\text{Na}_2\text{SO}_4$ . After the removal of solvent, the residue was purified on a silica gel column chromatography.

**4'-(dimethylamino)-[1,1'-biphenyl]-2-carbaldehyde**: 88% yield; m.p. 77.4-79.3°C; <sup>1</sup>H NMR(400MHz, CDCl<sub>3</sub>) δ 2.93(s, 6H), 6.71(d, *J*=7.6 Hz, 2H), 7.17(d, *J*=8.0Hz, 2H), 7.31-7.37(m, 2H), 7.50(t, *J*=7.6Hz, 1H), 7.79(d, *J*=8.0Hz, 1H), 9.94(s, 1H); <sup>13</sup>C NMR(100MHz, CDCl<sub>3</sub>) δ 40.58, 112.05, 126.63, 127.54, 130.63, 131.10, 133.42, 133.61, 146.30, 150.26, 193.54; EI-MS (70eV) *m/z* (%) 225(M<sup>+</sup>, 100), 196(45), 182(29), 167(12), 152(49), 141(13), 128(17), 115(17), 69(23), 51 (25), 42(47).

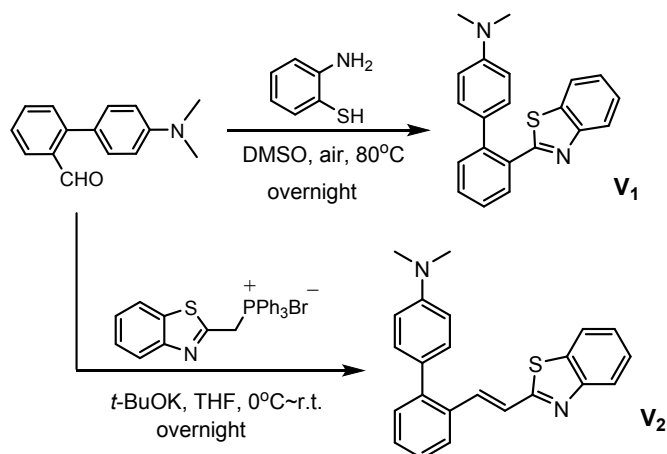

At room temperature, the solution of 2-aminothiophenol (12 mmol, 1.5 g) in DMSO (10 mL) was added into the solution of 4'-(dimethylamino)-[1,1'-biphenyl]-2-carbaldehyde (10 mmol, 2.25 g) in DMSO (10 mL) and the resulted solution was heated at 80 °C open to the air overnight and then cooled to room temperature. The solution was diluted with water and extracted by CH<sub>2</sub>Cl<sub>2</sub> (2×15 mL). The combined organic layers were dried over anhydrous Na<sub>2</sub>SO<sub>4</sub>. After the removal of solvent, the residue was purified on a silica gel column chromatography to produce V<sub>1</sub>.

**2'-(benzo[d]thiazol-2-yl)-N,N-dimethyl-[1,1'-biphenyl]-4-amine (V<sub>1</sub>)**: 64% yield; m.p. 125.1-126.3°C; <sup>1</sup>H NMR(400MHz, CDCl<sub>3</sub>) δ 2.97(s, 6H), 6.69(d, *J*=8 Hz, 2H), 7.18(d, *J*=8 Hz, 2H), 7.29(t, *J*=8 Hz, 1H), 7.39-7.50(m, 4H), 7.71(d, *J*=8 Hz, 1H), 8.05-8.08(m, 2H); <sup>13</sup>C NMR(100MHz, CDCl<sub>3</sub>) δ 40.39, 112.09, 121.38, 123.08, 124.67, 125.68, 126.92, 127.66, 129.97, 130.33, 130.85, 130.98, 132.53, 136.85, 142.01, 150.05, 152.74, 168.54; EI-MS (70eV) *m/z* (%) 330(M<sup>+</sup>,100), 313(22), 286(13).

At 0°C and N<sub>2</sub> flux, *t*-BuOK (10mmol, 1.12 g) was added into 2-methylbenzo[d]thiazolyltriphenylphosphonium bromide (10 mmol, 4.90 g) in dried THF (20 mL), the mixture was stirred for 30 min. The solution of compound 4'-(dimethylamino)-[1,1'-biphenyl]-2-carbaldehyde (10 mmol, 2.25 g) in dried THF (15 mL) was injected into the above mixture. The resulted mixture was kept at the same temperature for 1 h and stirred at room temperature overnight. After poured into water, the mixture was extracted with ethyl acetate (2×15 mL). The combined organic layers were dried over anhydrous Na<sub>2</sub>SO<sub>4</sub>. After the removal of solvent, the residue was purified on a silica gel column chromatography to produce V<sub>2</sub>.

**(E)-2'-(2-(benzo[d]thiazol-2-yl)vinyl)-N,N-dimethyl-[1,1'-biphenyl]-4-amine(V<sub>2</sub>)**:73% yield; m.p. 114.9-116.3°C; <sup>1</sup>H NMR(400MHz, CDCl<sub>3</sub>) δ 3.03(s, 6H), 6.83(d, *J*=8.8Hz, 2H), 7.29-7.47(m, 8H), 7.62(d, *J*=16Hz, 1H), 7.78(m, 2H), 7.98(d, *J*=8.0Hz, 1H); <sup>13</sup>C NMR (100MHz, CDCl<sub>3</sub>) δ 40.51, 112.13, 121.38, 121.70, 122.57, 122.86, 123.61, 125.19, 126.15, 126.45, 126.85, 129.16, 130.34, 130.83, 133.34, 134.30, 138.21, 142.32, 153.88, 167.89; EI-MS (70eV) *m/z* (%) 356(M<sup>+</sup>, 57), 310(11), 236(22), 221(100), 178(24), 108(12), 69(21), 42(12).

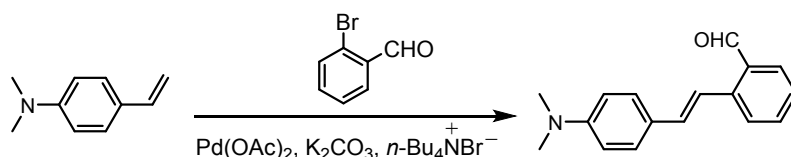

At room temperature and  $N_2$  flux, the solution of 2-bromobenzaldehyde (10 mmol, 1.83 g) in acetonitrile (10 mL) was injected into the mixture of  $Pd(OAc)_2$  (0.5 mmol, 0.112 g),  $K_2CO_3$  (12 mmol, 1.66 g), 4-dimethylaminostyrene (12 mmol, 1.76 g) and *n*-tetrabutylammonium bromide (30 mmol, 9.63 g) in acetonitrile (15 mL). The resulted mixture was stirred and refluxed for overnight. After cooled to the room temperature, the mixture was filtrated and the filtrate was diluted with water. The extracted EtOAc layers (2×15 mL) were combined and dried over anhydrous  $Na_2SO_4$ . After the removal of solvent, the residue was purified on a silica gel column chromatography.

**(E)-2-(4-(dimethylamino)styryl)benzaldehyde:** 81% yield; m.p. 115.5-117°C;  $^1H$  NMR(400MHz,  $CDCl_3$ )  $\delta$ 2.99(s, 6H), 6.72(d,  $J=8$  Hz, 2H), 7.00(d,  $J=16$  Hz, 1H), 7.35(t,  $J=7.6$  Hz, 1H), 7.46(d,  $J=8$  Hz, 2H), 7.53(t,  $J=7.6$  Hz, 1H), 7.69(d,  $J=7.6$  Hz, 1H), 7.80 (s, 1H), 7.83(d,  $J=8$  Hz, 1H), 10.34(s, 1H);  $^{13}C$  NMR (100MHz,  $CDCl_3$ )  $\delta$ 40.45, 112.38, 119.72, 126.66, 126.76, 128.20, 131.74, 132.48, 133.61, 134.48, 141.06, 150.49, 192.73; EI-MS (70eV)  $m/z$  (%)251( $M^+$ , 100), 222(78), 207(33), 178(46), 165(12).

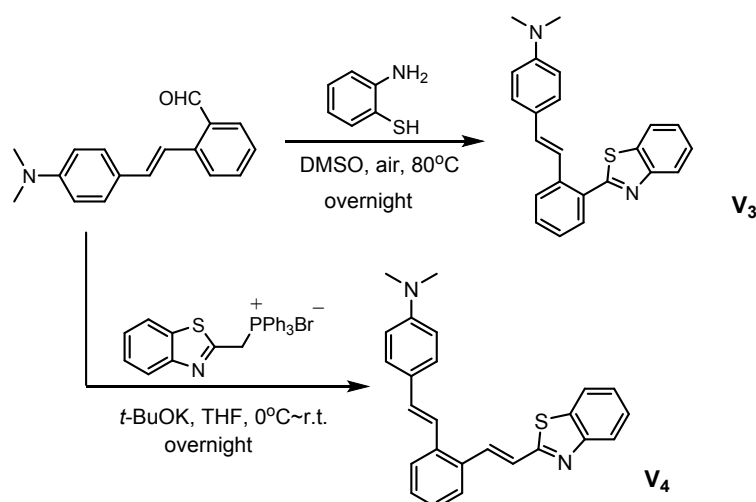

At room temperature, the solution of 2-aminothiophenol (12 mmol, 1.5 g) in DMSO (10 mL) was added into the solution of (E)-2-[4-(dimethylamino)styryl]benzaldehyde (10 mmol, 2.51 g) in DMSO (10 mL) and the resulted solution was heated at 80 °C open to the air overnight and then cooled to room temperature. The solution was diluted with water and extracted by  $CH_2Cl_2$  (2×15 mL). The combined organic layers were dried over anhydrous  $Na_2SO_4$ . After the removal of solvent, the residue was purified on a silica gel column chromatography to produce **V<sub>3</sub>**.

**(E)-4-(2-(benzo[d]thiazol-2-yl)styryl)-N,N-dimethylaniline (V<sub>3</sub>):** 56% yield; m.p. 104.5-106.1°C;  $^1H$  NMR(400MHz,  $CDCl_3$ )  $\delta$ 2.95(s, 6H), 6.68(d,  $J=8$  Hz, 2H), 7.04(d,  $J=16$  Hz, 1H), 7.32(t,  $J=8$  Hz, 1H), 7.39(m, 3H), 7.45(t,  $J=8$  Hz, 1H), 7.50(t,  $J=8$  Hz, 1H), 7.59(d,  $J=16$  Hz, 1H), 7.45(d,  $J=8$  Hz, 1H), 7.84(d,  $J=8$  Hz, 1H), 7.90(d,  $J=8$  Hz, 1H), 8.14(d,  $J=8$  Hz, 1H);  $^{13}C$  NMR (100MHz,  $CDCl_3$ )  $\delta$  40.40, 112.34, 121.39, 122.46, 122.50, 123.43, 125.03, 125.80, 126.12, 126.63, 126.79, 128.00, 130.22, 130.64, 131.64, 131.95, 137.86, 150.23, 153.68, 167.58; EI-MS (70eV)  $m/z$  (%) 356( $M^+$ , 100), 339(16), 236(100), 178(11).

At 0°C and N<sub>2</sub> flux, *t*-BuOK (10mmol, 1.12 g) was added into 2-methylbenzo[*d*]thiazolyltriphenylphosphonium bromide (10 mmol, 4.90 g) in dried THF (20 mL), the mixture was stirred for 30 min. The solution of compound (*E*)-2-[4-(dimethylamino)styryl]benzaldehyde (10 mmol, 2.51 g) in dried THF (15 mL) was injected into the above mixture. The resulted mixture was kept at the same temperature for 1 h and stirred at room temperature overnight. After poured into water, the mixture was extracted with ethyl acetate (2×15 mL). The combined organic layers were dried over anhydrous Na<sub>2</sub>SO<sub>4</sub>. After the removal of solvent, the residue was purified on a silica gel column chromatography to produce **V**<sub>4</sub>.

**4-{(E)-2-[(E)-2-(benzo[*d*]thiazol-2-yl)vinyl]styryl}-N,N-dimethylaniline (**V**<sub>4</sub>):** 42% yield; m. p. 123.5-124.8°C; <sup>1</sup>H NMR(400MHz, CDCl<sub>3</sub>) δ 2.99(s, 6H), 6.73(d, *J*= 8Hz, 2H), 6.94(d, *J*=16 Hz, 1H), 7.24-7.38(m, 5H), 7.46(m, 3H), 7.58(d, *J*= 8Hz, 1H), 7.63(d, *J*= 8 Hz, 1H), 7.84(d, *J*= 8 Hz, 1H), 7.94(d, *J*=16 Hz, 1H), 8.00(d, *J*=8 Hz, 1H); <sup>13</sup>C NMR (100MHz, CDCl<sub>3</sub>) δ 40.45, 112.43, 121.29, 121.50, 123.00, 123.71, 123.75, 125.32, 126.28, 126.85, 127.05, 127.89, 129.30, 132.92, 133.32, 134.39, 136.15, 136.20, 137.88, 150.90, 153.97, 167.37; EI-MS (70eV) *m/z* (%) 382 (M<sup>+</sup>, 100) , 370(11), 262(12), 247(82), 234(12), 202(10), 191(11), 134(36), 121(10).

### **X-ray structure analysis**

Single crystals of the title compounds grown in MeCN/EtOH were selected for the X-ray analysis. The diffraction data were collected on a Bruker CCD area-detector diffractometer equipped with a graphite-monochromated MoK $\alpha$  radiation ( $\lambda=0.71073$  Å). The unit cell parameters were determined from a least-squares refinement of the setting angles. The structure was solved by direct methods and refined on  $F^2$  by the full-matrix least-squares methods with SHELXS-97. The refinement was carried out by full-matrix least squares method on the positional and anisotropic temperature parameters of the non-hydrogen atoms using SHELXL-97. All H atoms were placed in the idealized positions and constrained to ride on their parent atoms. Compound **V**<sub>1</sub>: C<sub>21</sub>H<sub>18</sub>N<sub>2</sub>S,  $M_w= 330.43$ , monoclinic, P 2<sub>1</sub>/C space group,  $a = 6.1982(5)$  Å,  $b = 24.956(2)$  Å,  $c = 10.8550(9)$ Å,  $\alpha = 90^\circ$ ,  $\beta = 97.234(8)^\circ$ ,  $\gamma = 90^\circ$ ,  $D_{\text{calculated}} = 1.318$  g cm<sup>-3</sup>,  $Z = 4$ ,  $F(000) = 696$ ,  $\mu = 0.198$  mm<sup>-1</sup>, 3767 reflections were corrected, 3648 unique,  $R_1 = 0.0456$ ,  $wR_2 = 0.1268$ ; Compound **V**<sub>2</sub>: C<sub>23</sub> H<sub>20</sub>N<sub>2</sub>S,  $M_w= 356.47$ , monoclinic, P 2<sub>1</sub>/C space group,  $a= 12.5537(8)$  Å,  $b = 6.3103(4)$  Å,  $c = 23.6534(17)$  Å,  $\alpha = 90^\circ$ ,  $\beta = 99.738(6)^\circ$ ,  $\gamma = 90^\circ$ ,  $D_{\text{calculated}} = 1.282$  g cm<sup>-3</sup>,  $Z = 4$ ,  $F(000) = 752$ ,  $\mu = 0.184$  mm<sup>-1</sup>, 3389 reflections were corrected, 3377 unique,  $R_1 = 0.0437$ ,  $wR_2 = 0.1125$ ; Compound **V**<sub>3</sub>: C<sub>23</sub>H<sub>20</sub>N<sub>2</sub>S,  $M_w= 356.47$ , monoclinic, P 2<sub>1</sub>/C space group,  $a = 12.0528(7)$  Å,  $b = 7.5440(3)$  Å,  $c = 40.438(2)$  Å,  $\alpha = 90^\circ$ ,  $\beta = 90.907(5)^\circ$ ,  $\gamma = 90^\circ$ ,  $D_{\text{calculated}} = 1.288$  g cm<sup>-3</sup>,  $Z = 8$ ,  $F(000) = 1504$ ,  $\mu = 0.185$  mm<sup>-1</sup>, 6724 reflections were corrected, 6696 unique,  $R_1 = 0.0549$ ,  $wR_2 = 0.1334$ . Crystallographic data for compound **V**<sub>1</sub> (CCDC1551667), **V**<sub>2</sub> (CCDC1521255), **V**<sub>3</sub> (CCDC1551666) were deposited at CCDC center and can be obtained free of charge from The Cambridge Crystallographic Data Centre via [www.ccdc.cam.ac.uk/data\\_request/cif](http://www.ccdc.cam.ac.uk/data_request/cif).

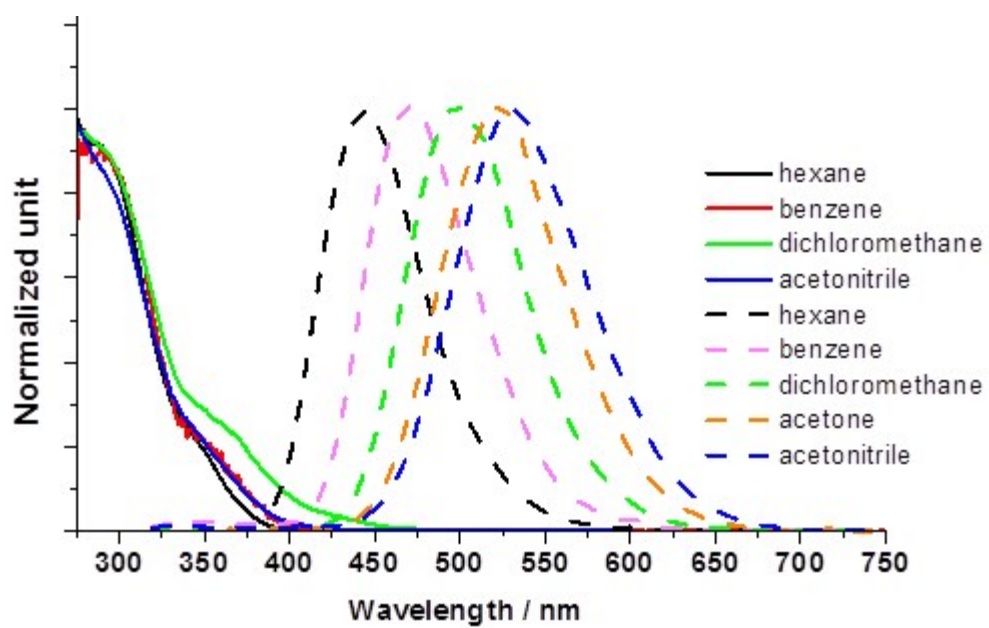

**Fig.S1** Absorption (solid lines) and emission spectra (dash lines,  $\lambda_{\text{ex}} = 300 \text{ nm}$ ) of **V<sub>1</sub>** (20  $\mu\text{M}$ ) in different solvents

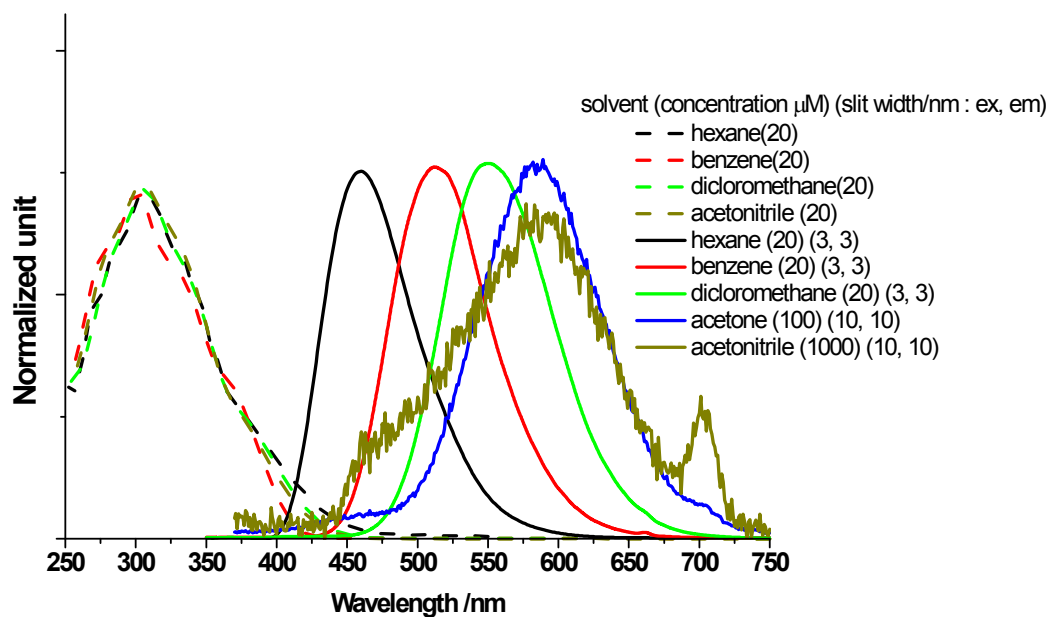

**Fig. S2** Absorption (dash line) and emission spectra (solid line,  $\lambda_{\text{ex}} = 350 \text{ nm}$ ) of  $\mathbf{V}_2$  in different solvents

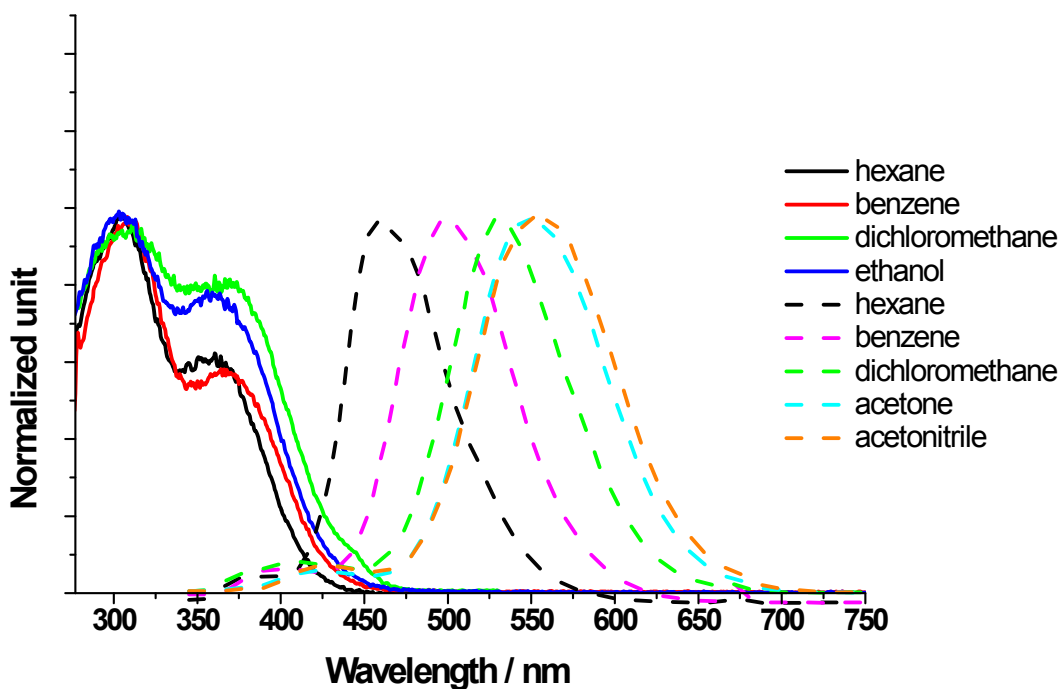

**Fig.S3** Absorption (solid lines) and emission spectra (dash lines,  $\lambda_{\text{ex}} = 335 \text{ nm}$ ) of  $\mathbf{V}_3$  (20  $\mu\text{M}$ ) in different solvents

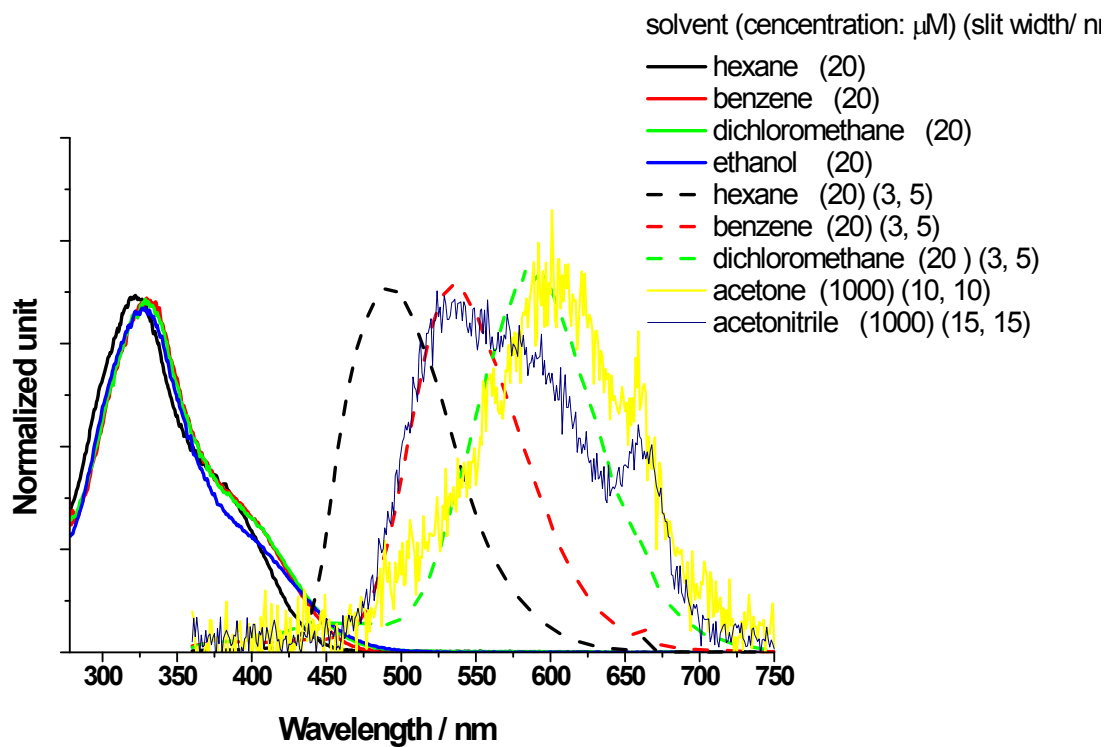

Fig. S4 Absorption (solid lines) and emission spectra (dash lines,  $\lambda_{\text{ex}} = 330 \text{ nm}$ ) of  $V_4$  in different solvents

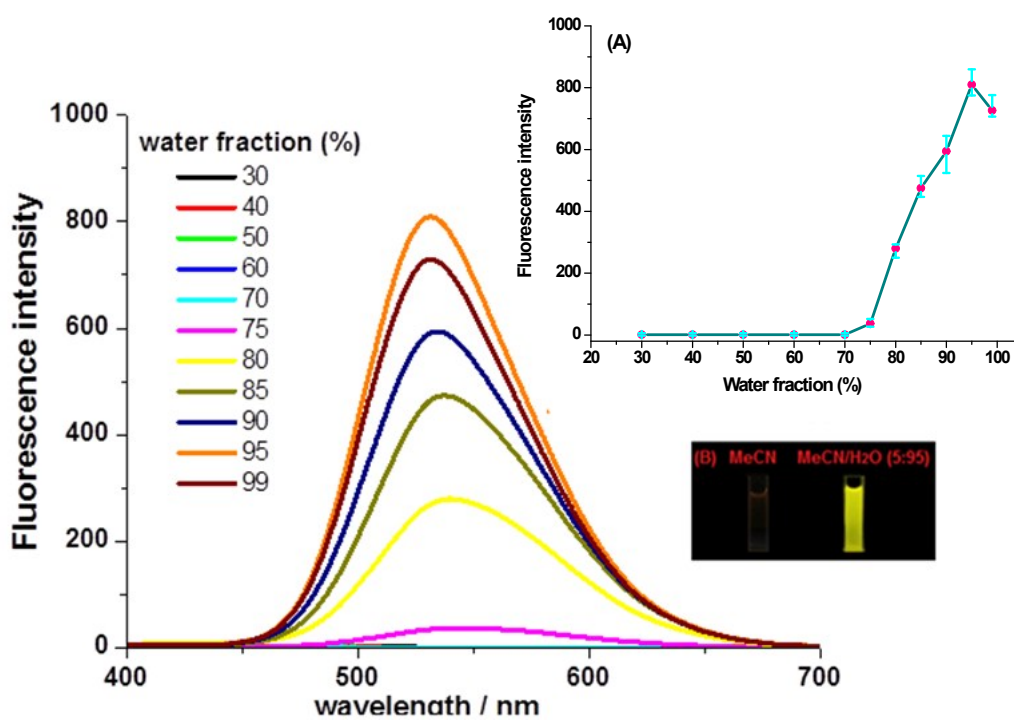

**Fig. S5** Emission spectra of  $V_2$  (50  $\mu$ M) in MeCN with varied water fraction [inserted: (A) the fluorescence intensity of  $V_2$  in MeCN with varied water fraction; (B) photos of  $V_2$  in MeCN and MeCN/H<sub>2</sub>O (v/v, 5:95) mixture]

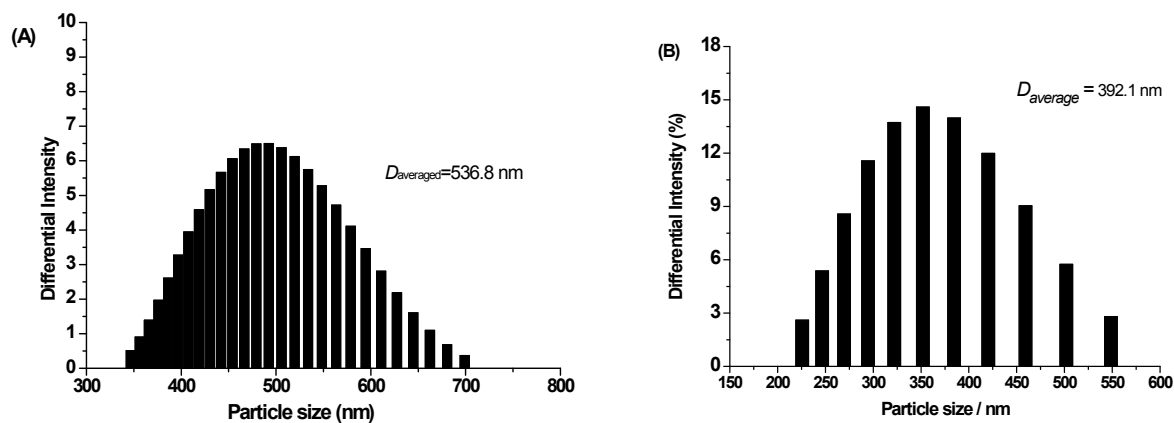

**Fig.S6** Dynamical light scattering measurement of  $V_4$  (A) and  $V_2$ (B) (50  $\mu$ M) in MeCN/H<sub>2</sub>O (5:95, v/v) mixture



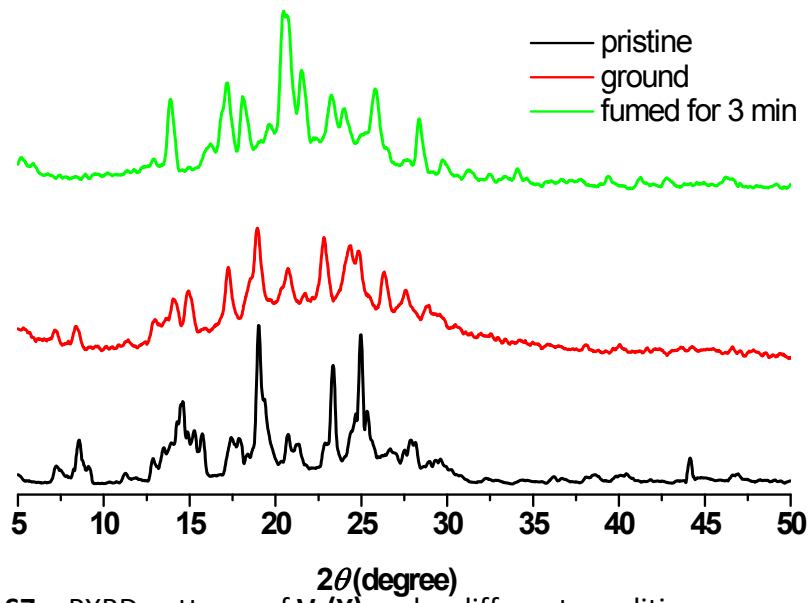

Fig. S7 PXRD patterns of  $V_3(Y)$  under different conditions

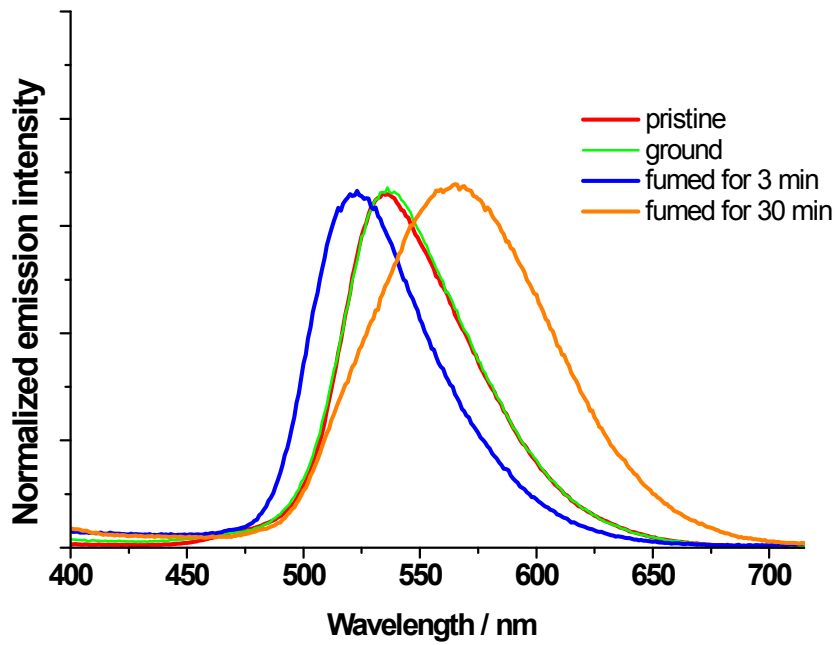

Fig. S8 Solid-state emission spectra of  $V_3(Y)$  under different conditions

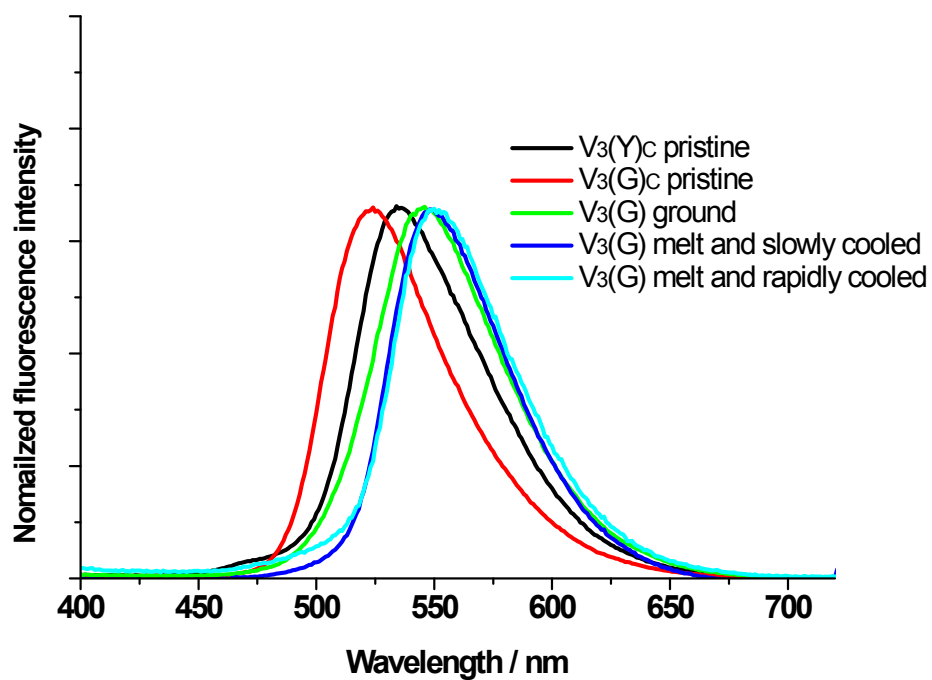

Fig. S9 Solid-state emission spectra of  $V_3(Y)_c$  and  $V_3(G)$  under different conditions

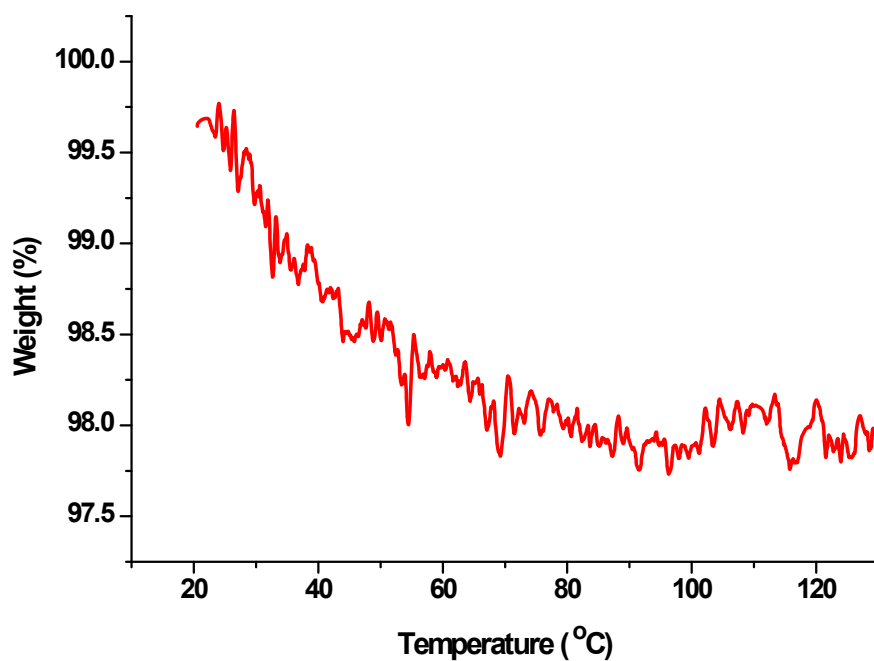

Fig. S10 Thermal gravimetric curve of  $V_3(G)_c$  sample

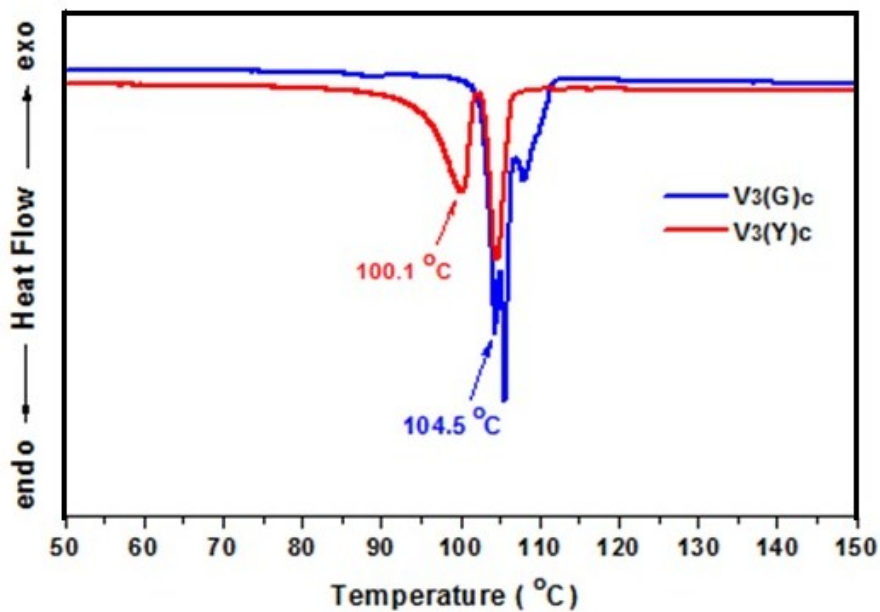

Fig. S11 Differential scanning calorimetry curves of  $V_3(G)_c$  and  $V_3(Y)_c$

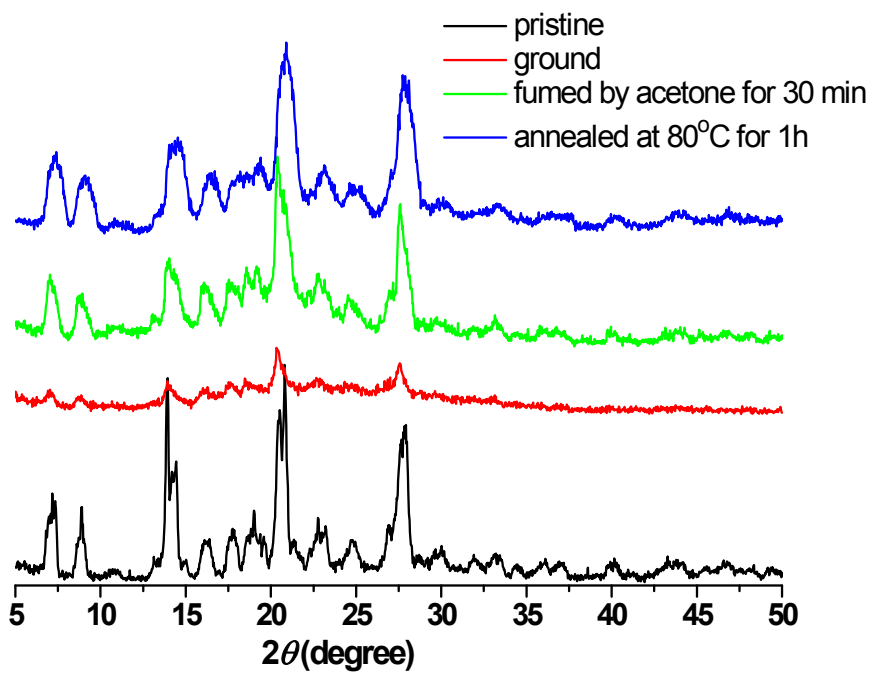

Fig. S12 PXRD patterns of  $V_1$  under different conditions

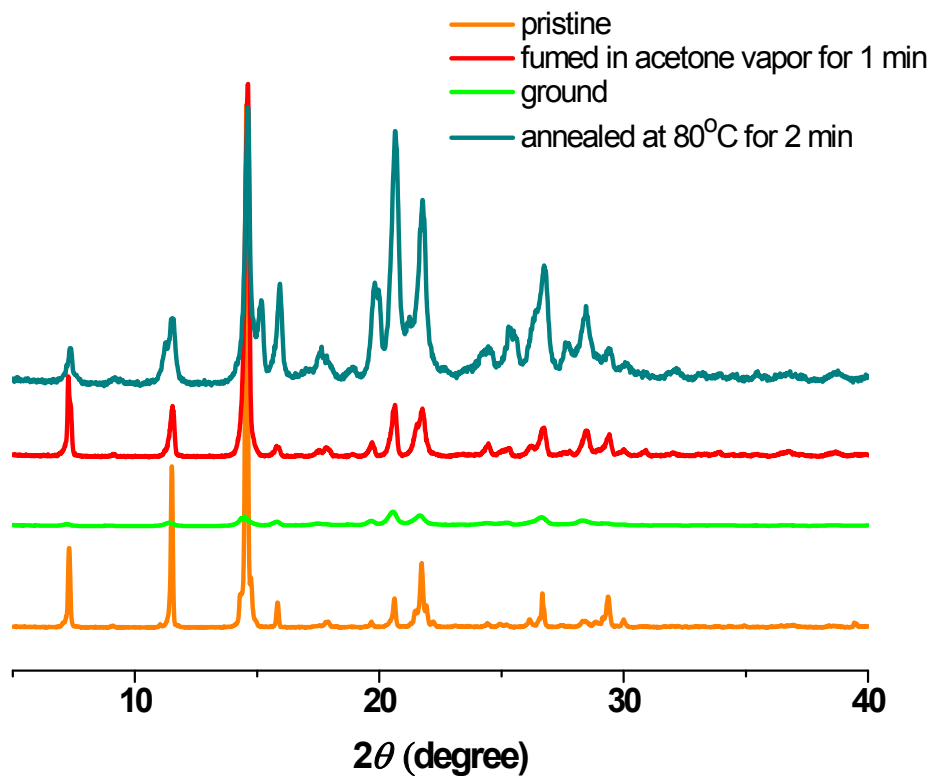

Fig.S13 PXRD patterns of V<sub>2</sub> under different conditions

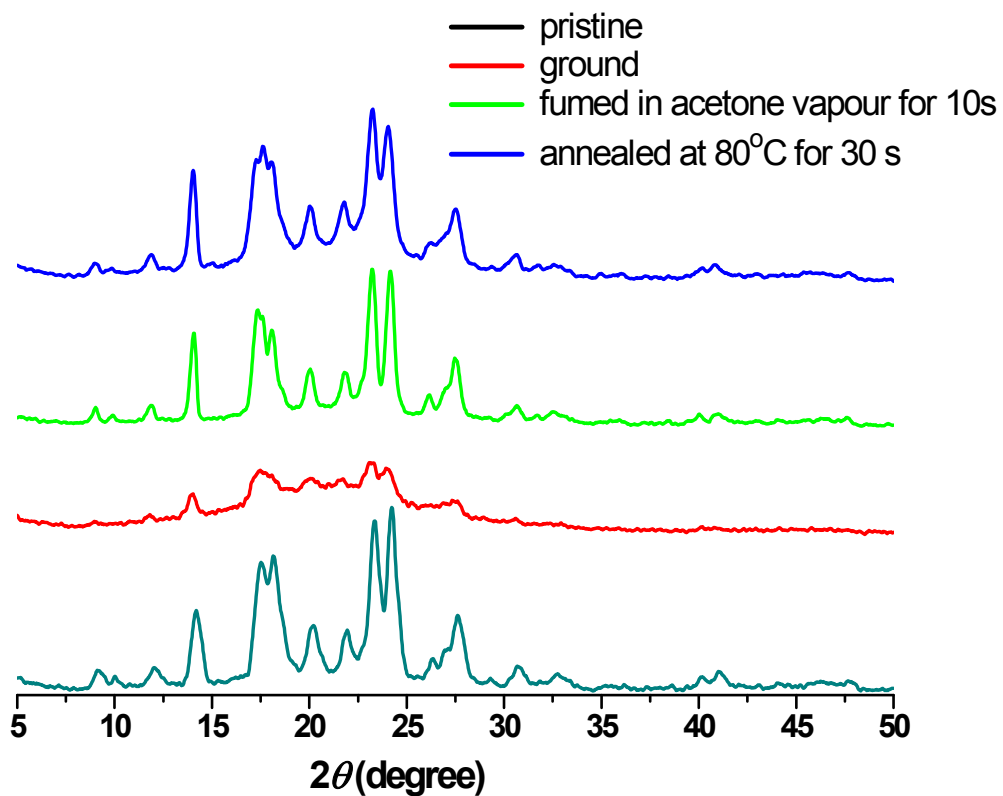

Fig. S14 PXRD patterns of V<sub>4</sub> under different conditions

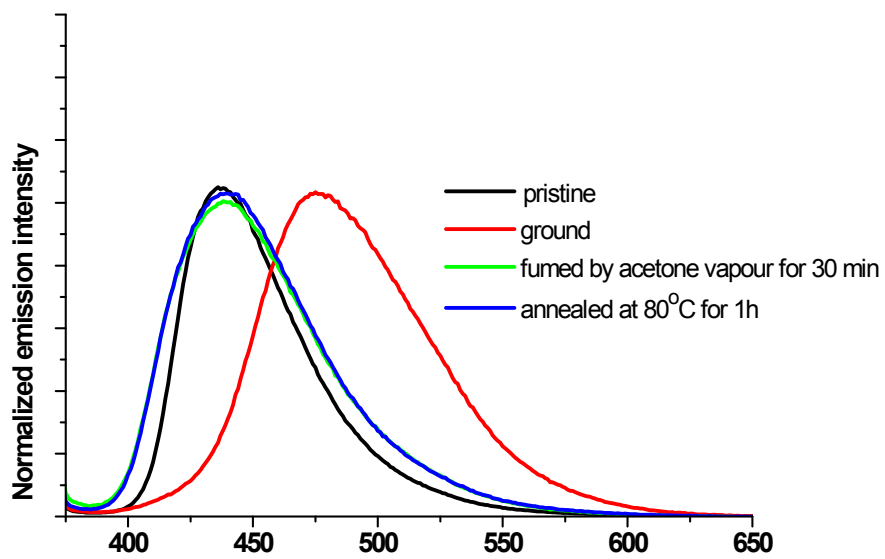

Fig. S15 Solid-state emission spectra of  $V_1$  under different conditions

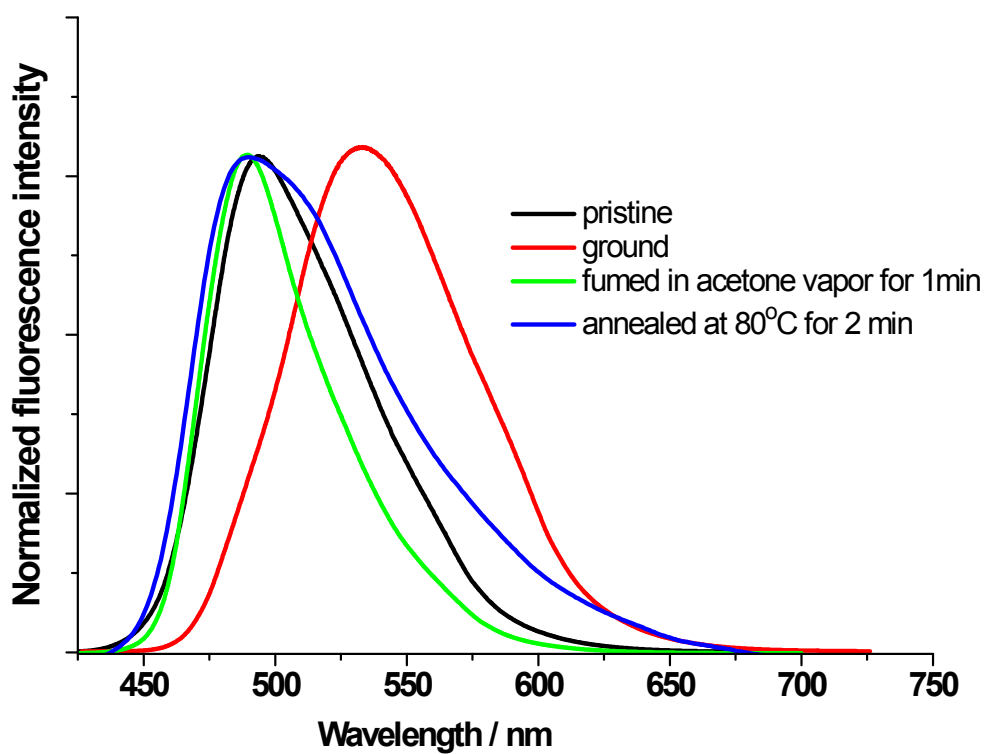

Fig. S16 Solid-state emission spectra of  $V_2$  under different conditions

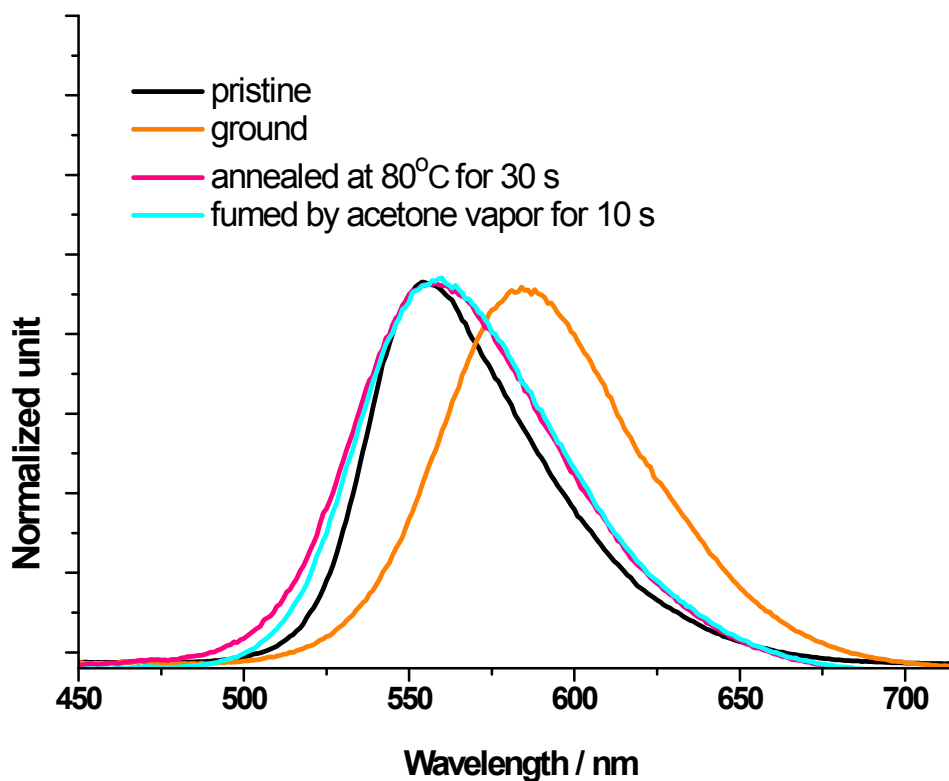

Fig.S17 Solid-state emission spectra of  $V_4$  under different conditions

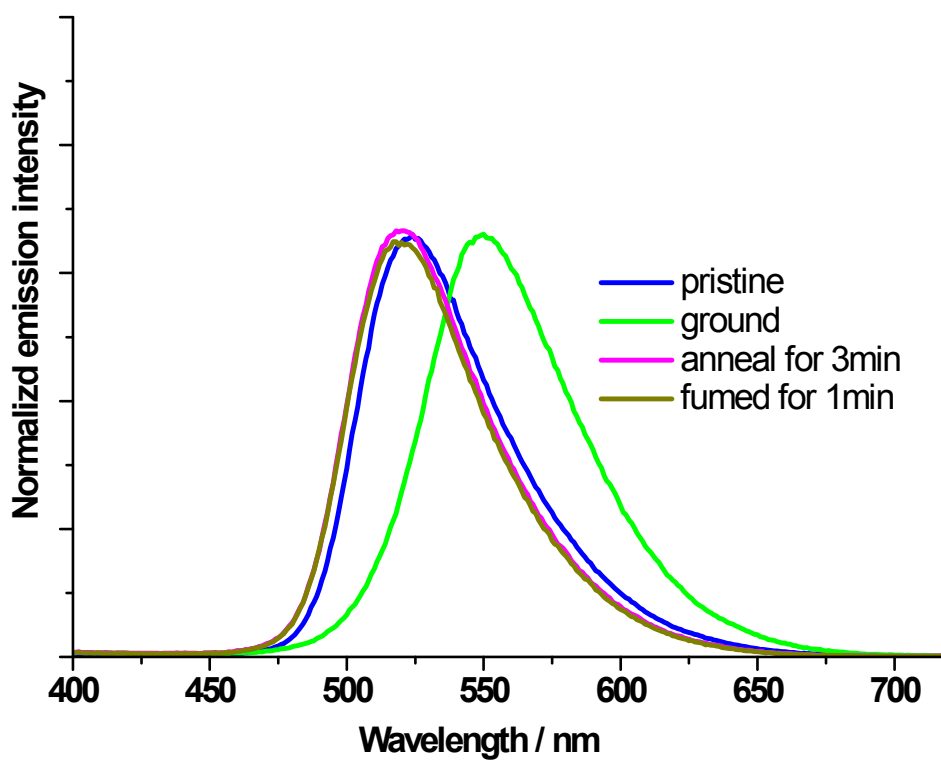

Fig. S18 Solid-state emission spectra of  $V_3(G)$  under different conditions

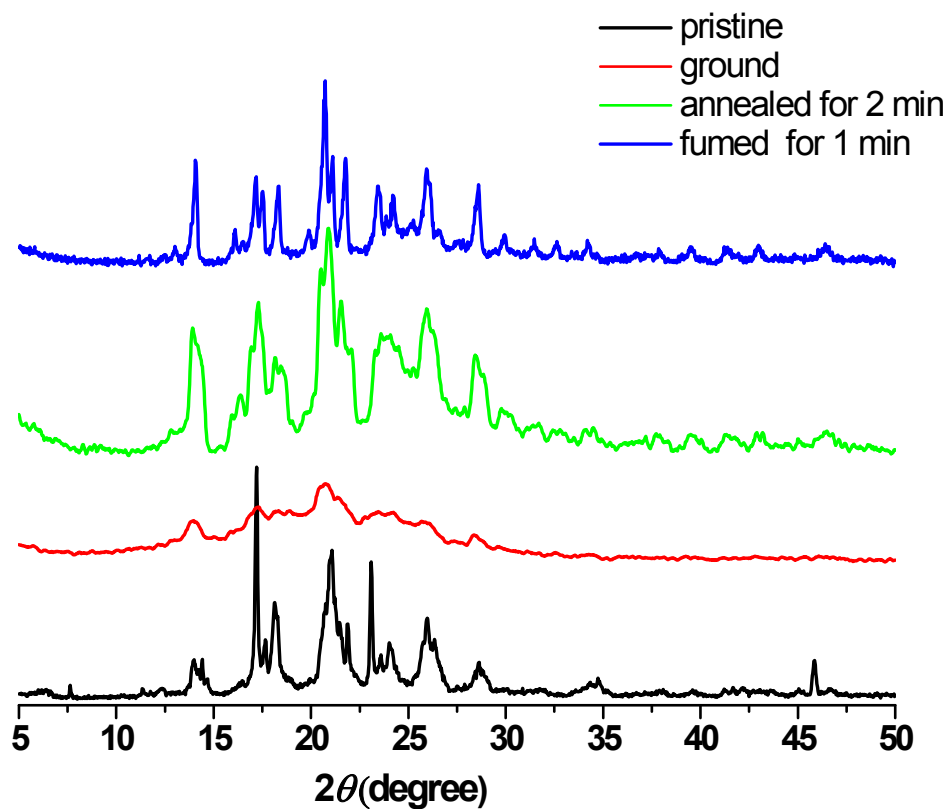

Fig. S19 PXRD patterns of  $V_3(G)$  under different conditions

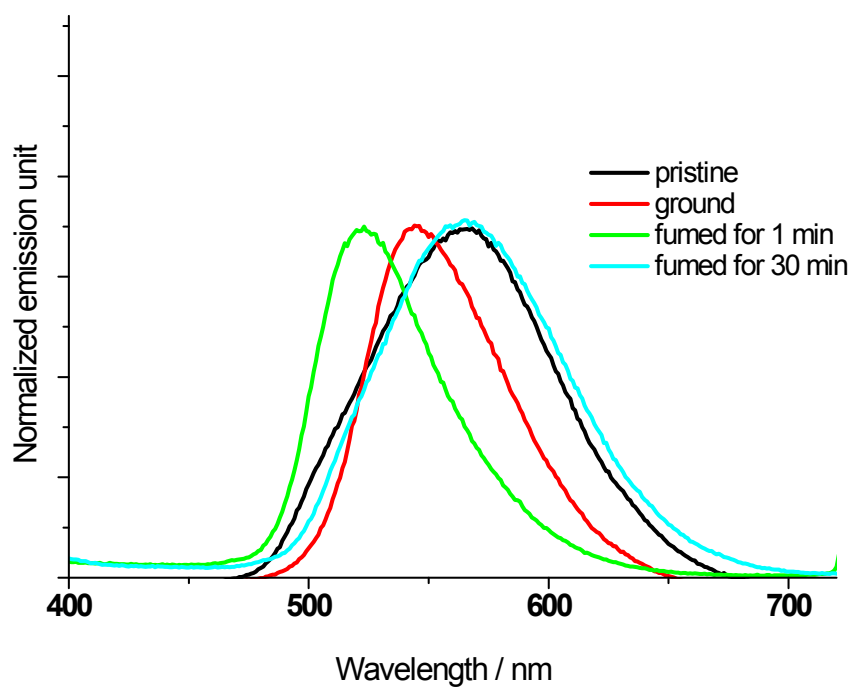

Fig. S20 Solid-state emission spectra of  $V_3(O)$  under different conditions

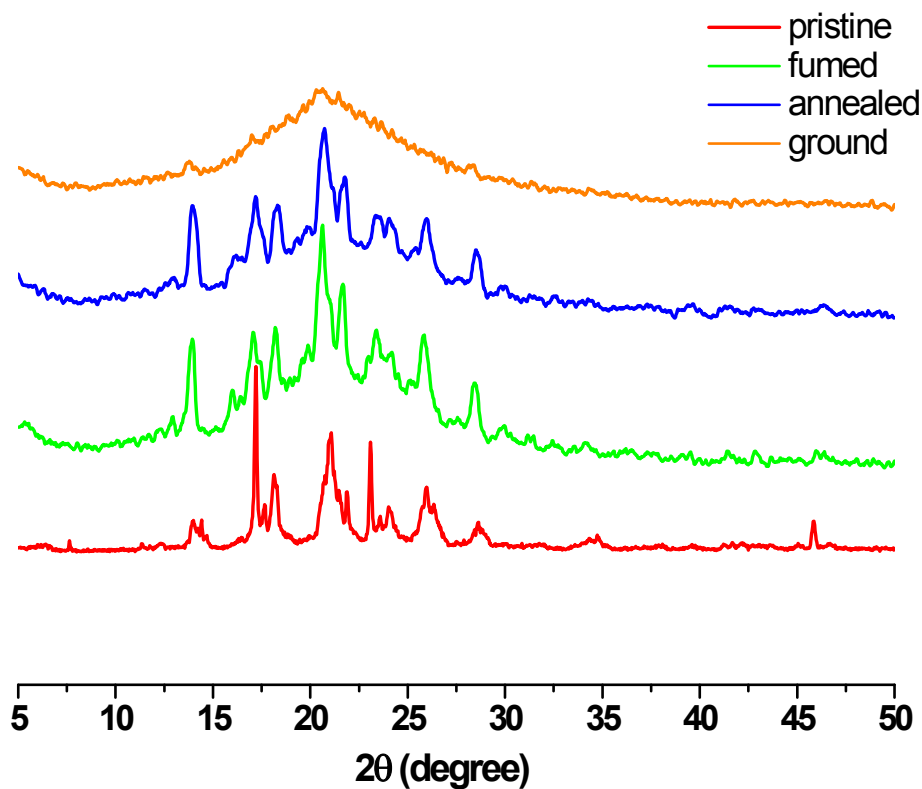

Fig. S21 PXRD patterns of  $V_3(O)$  under different conditions

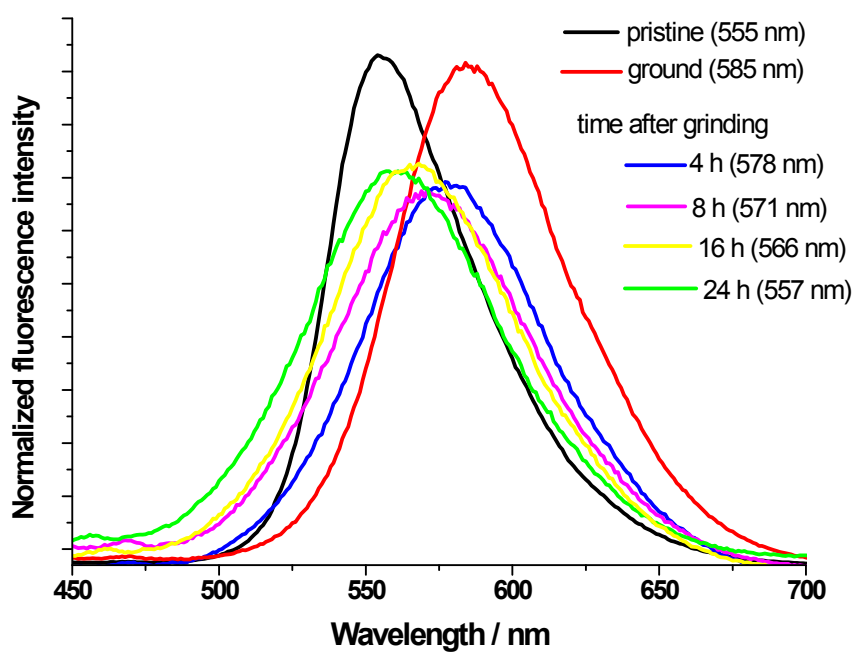

Fig. S22 Solid-state emission spectra of  $V_4$  before and after grinding as well as those of the ground sample for different time interval



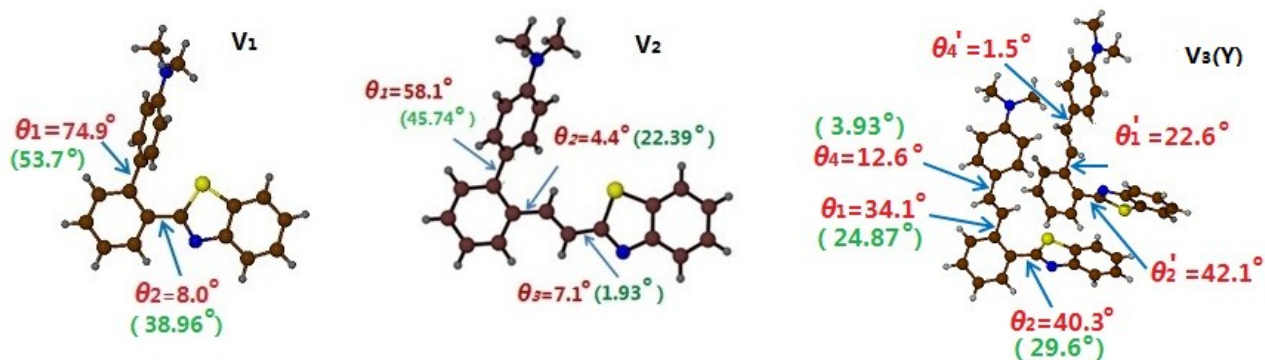

**Fig. S23** Molecular geometries of  $V_1$ ,  $V_2$  and  $V_3(\mathbf{Y})$  in crystalline phase (red data) and gas phase (green data)

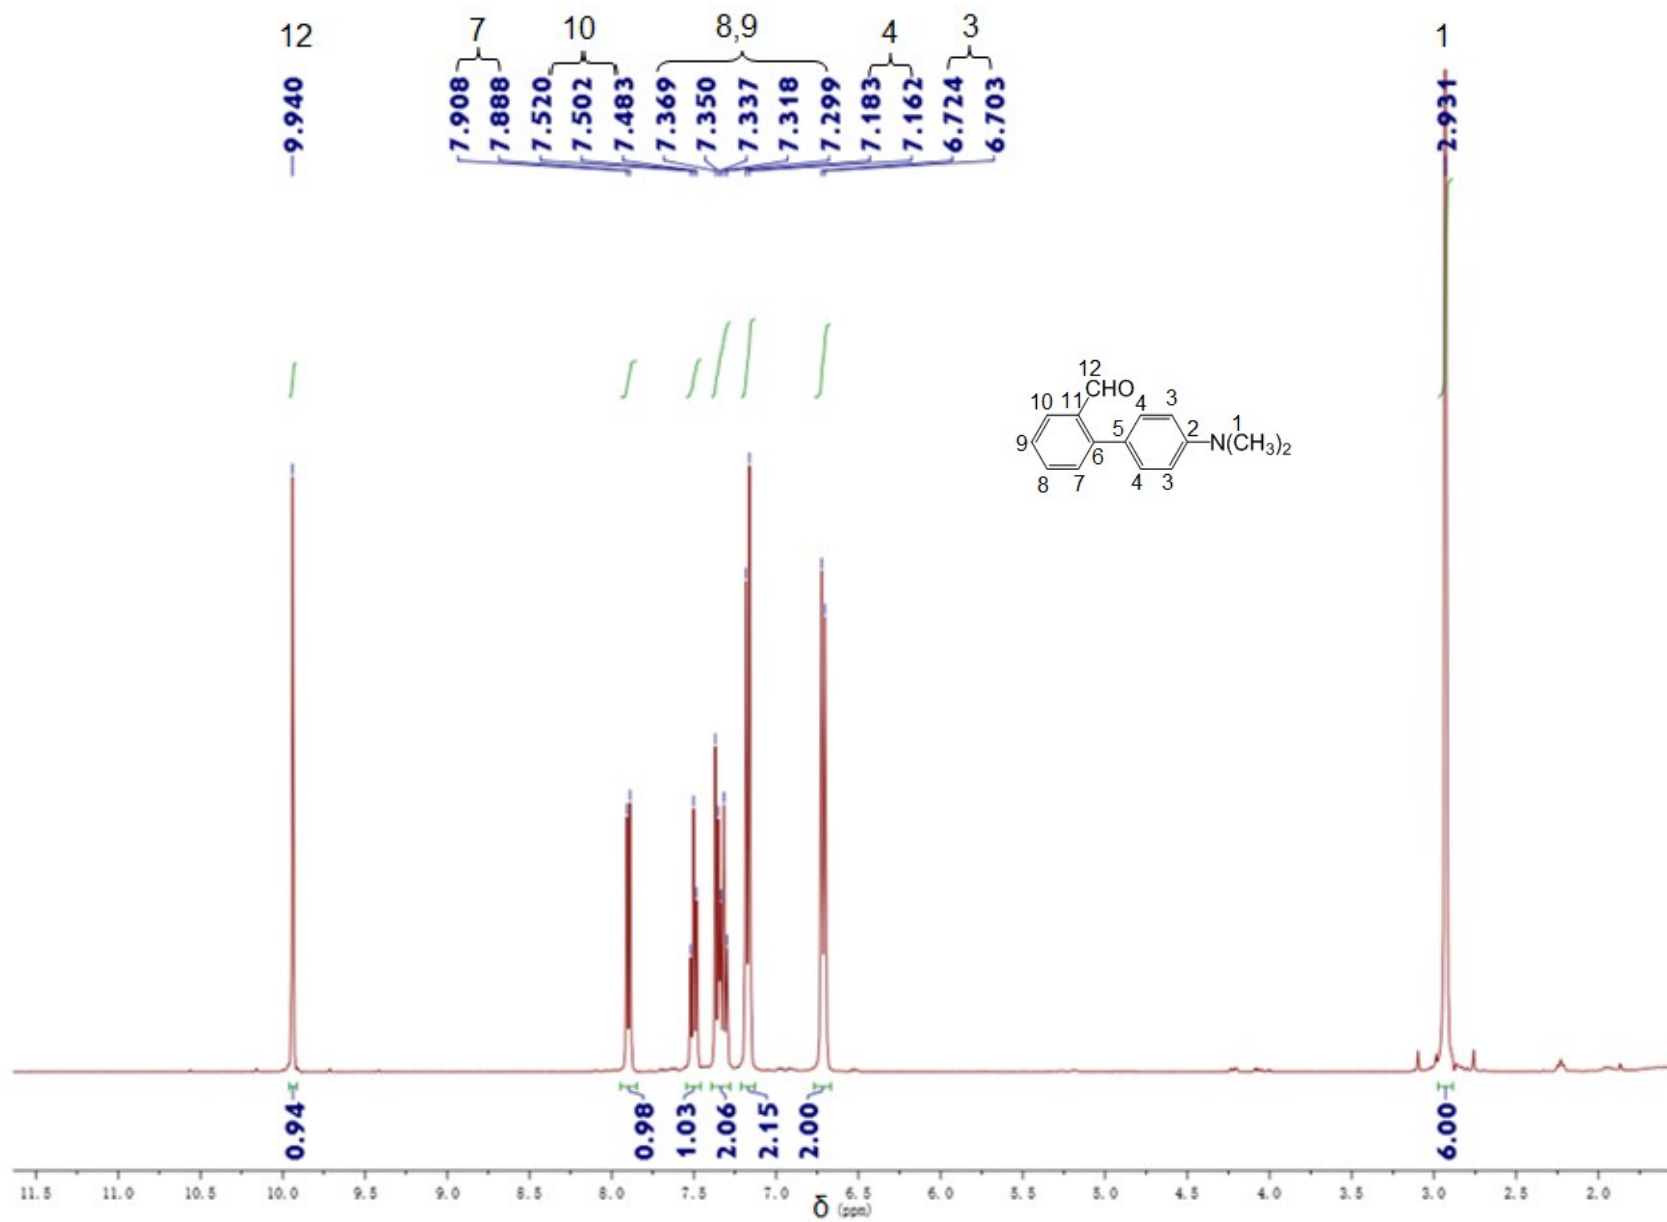

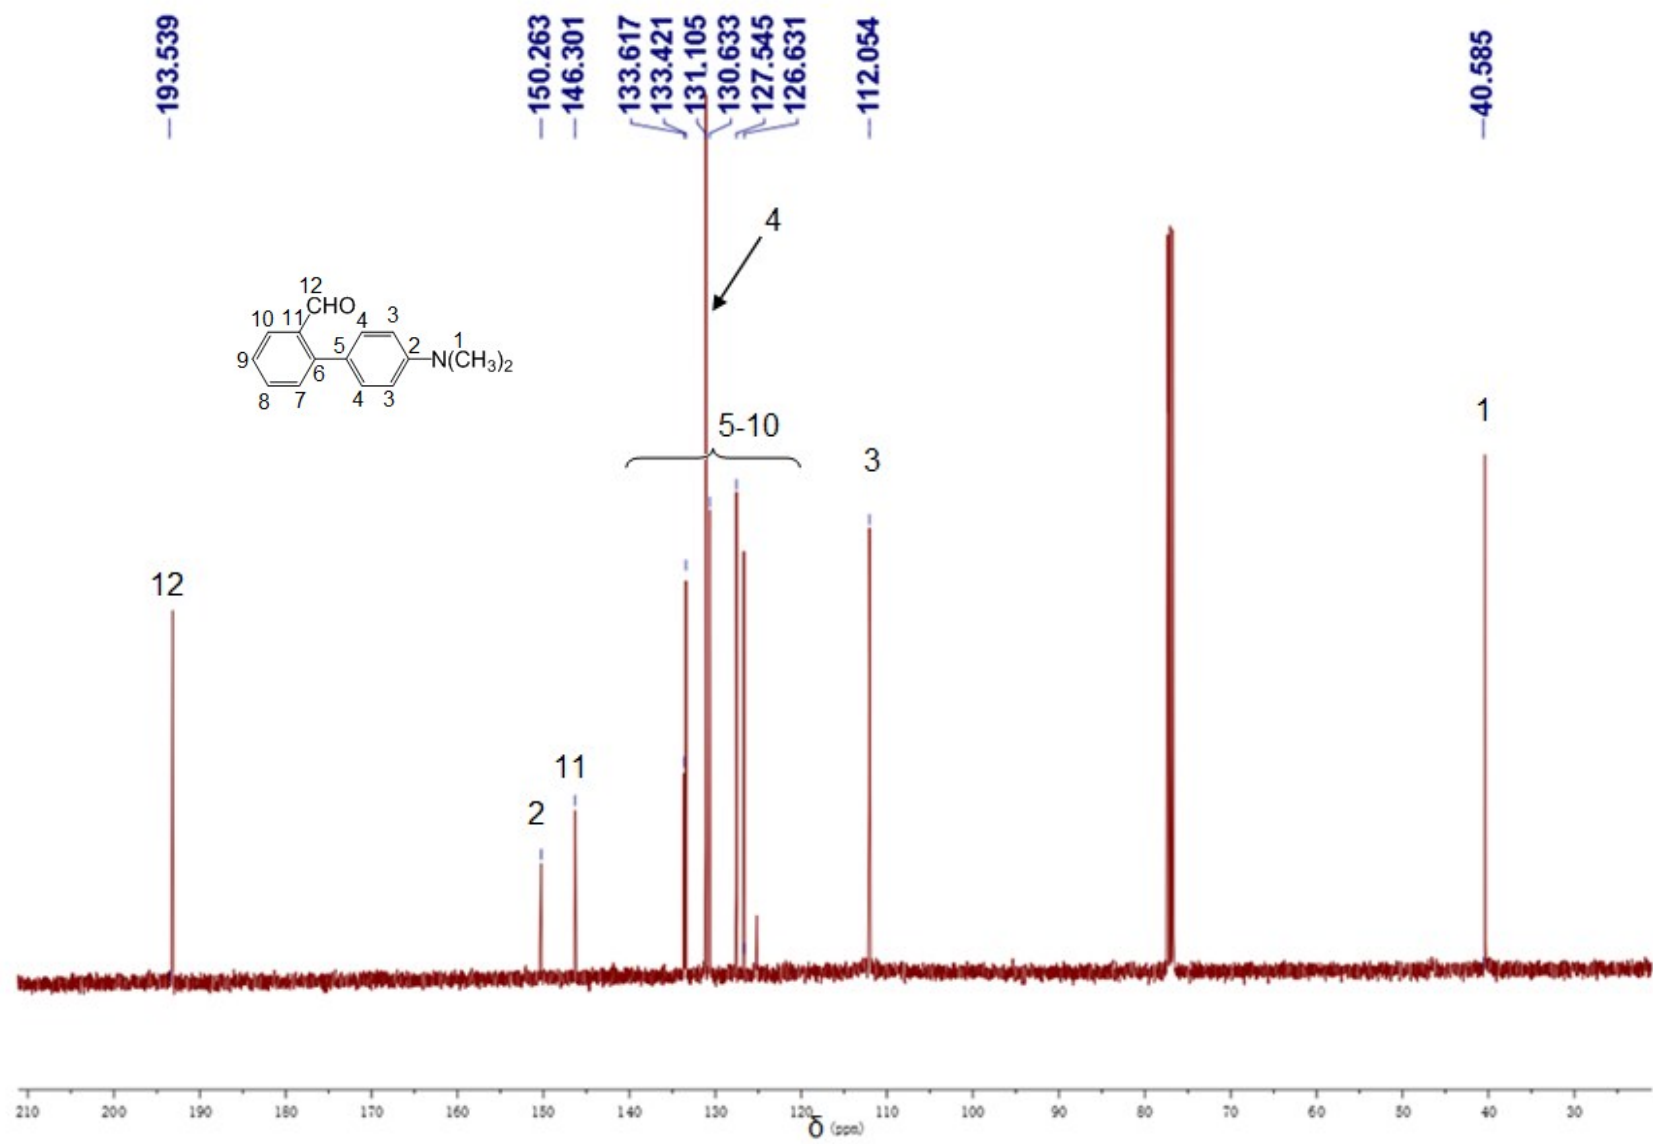

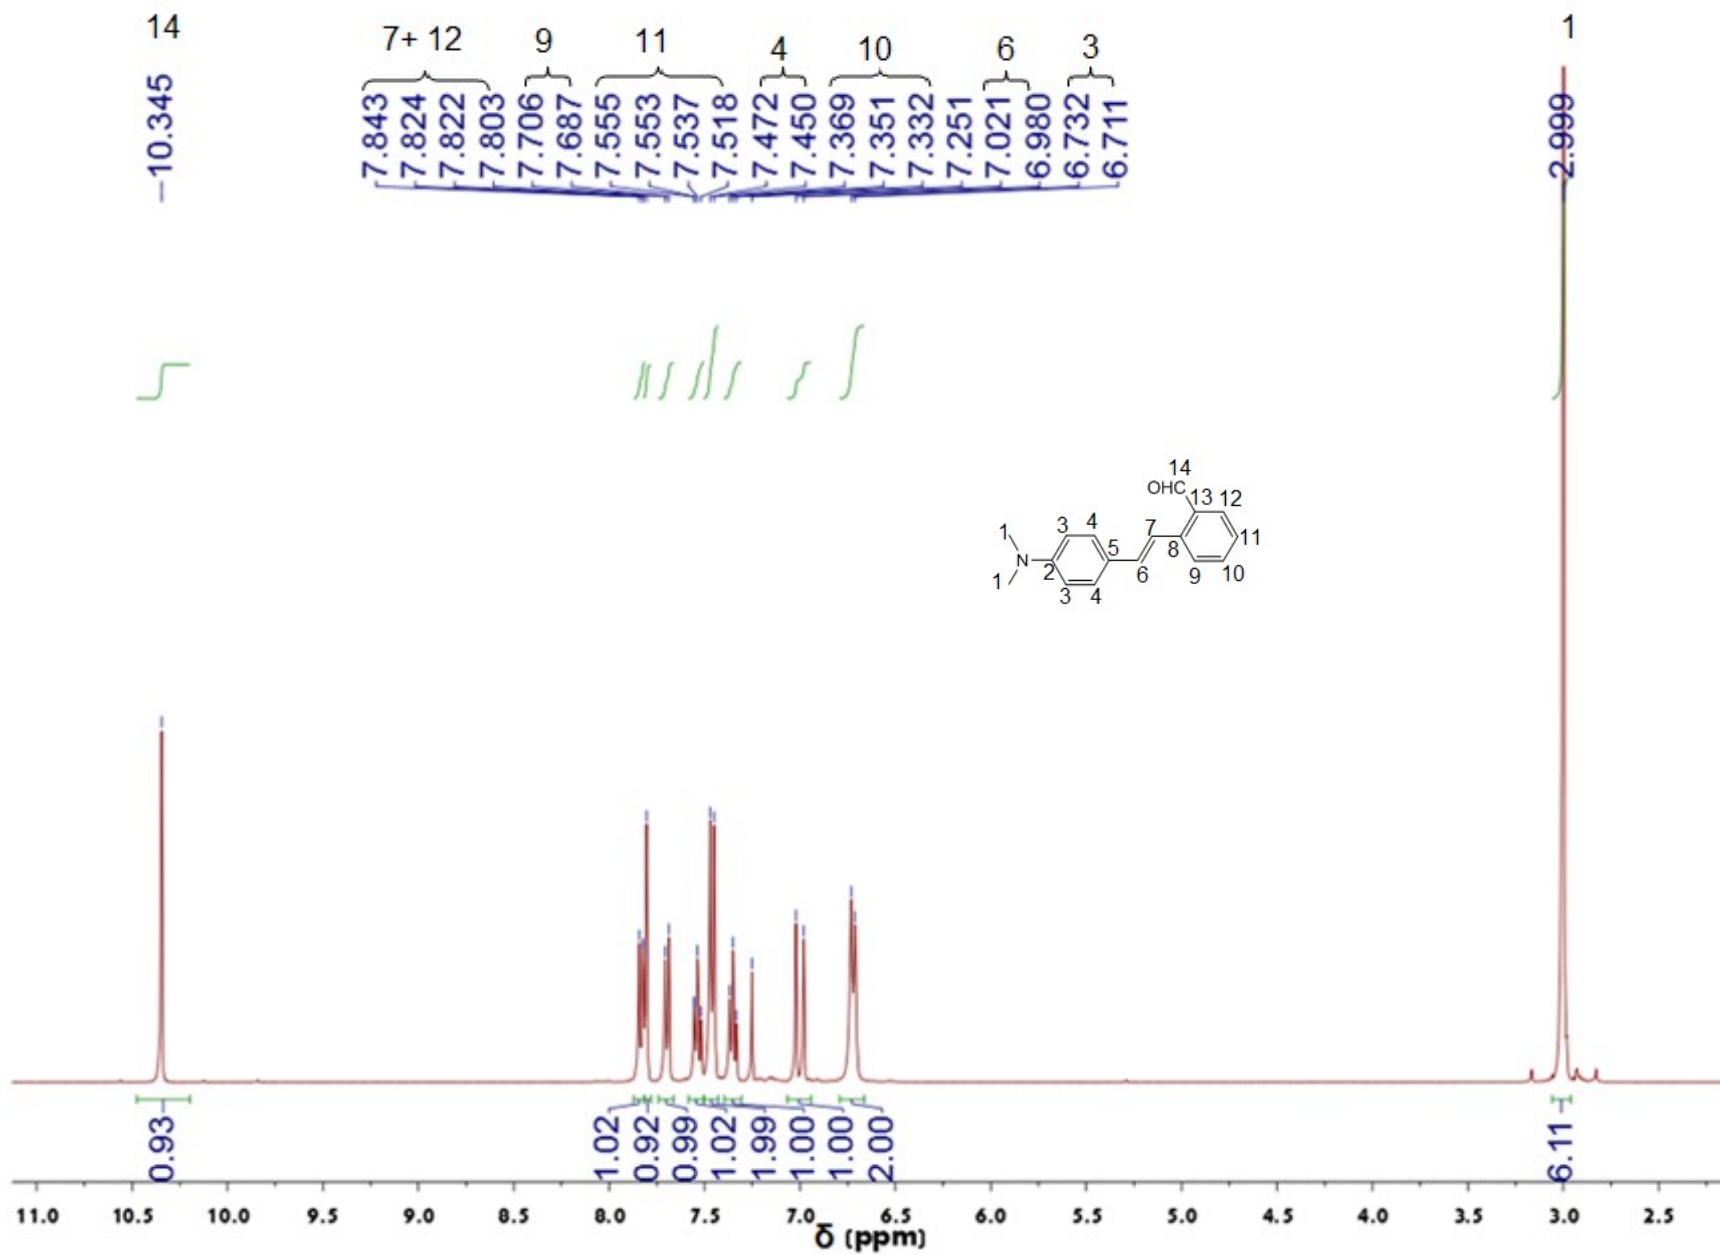

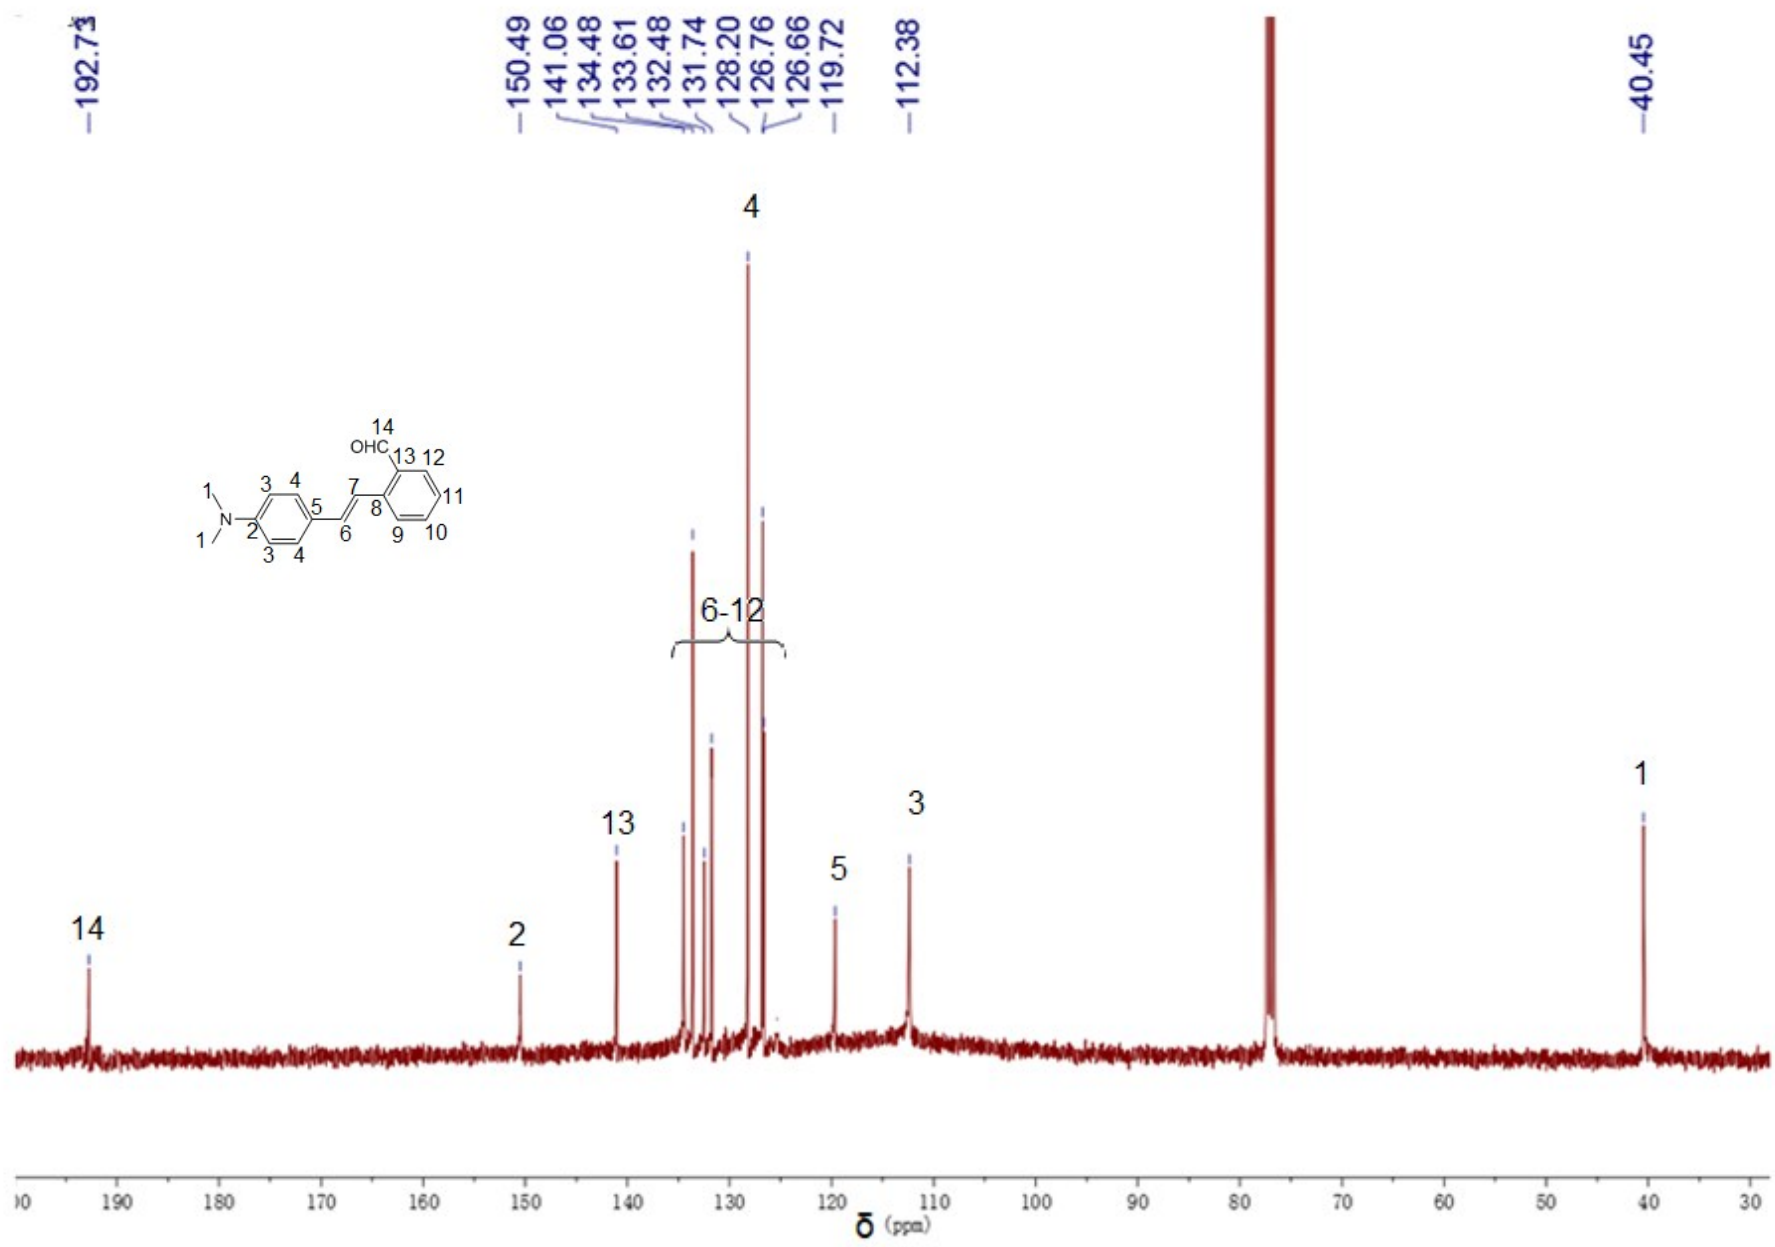

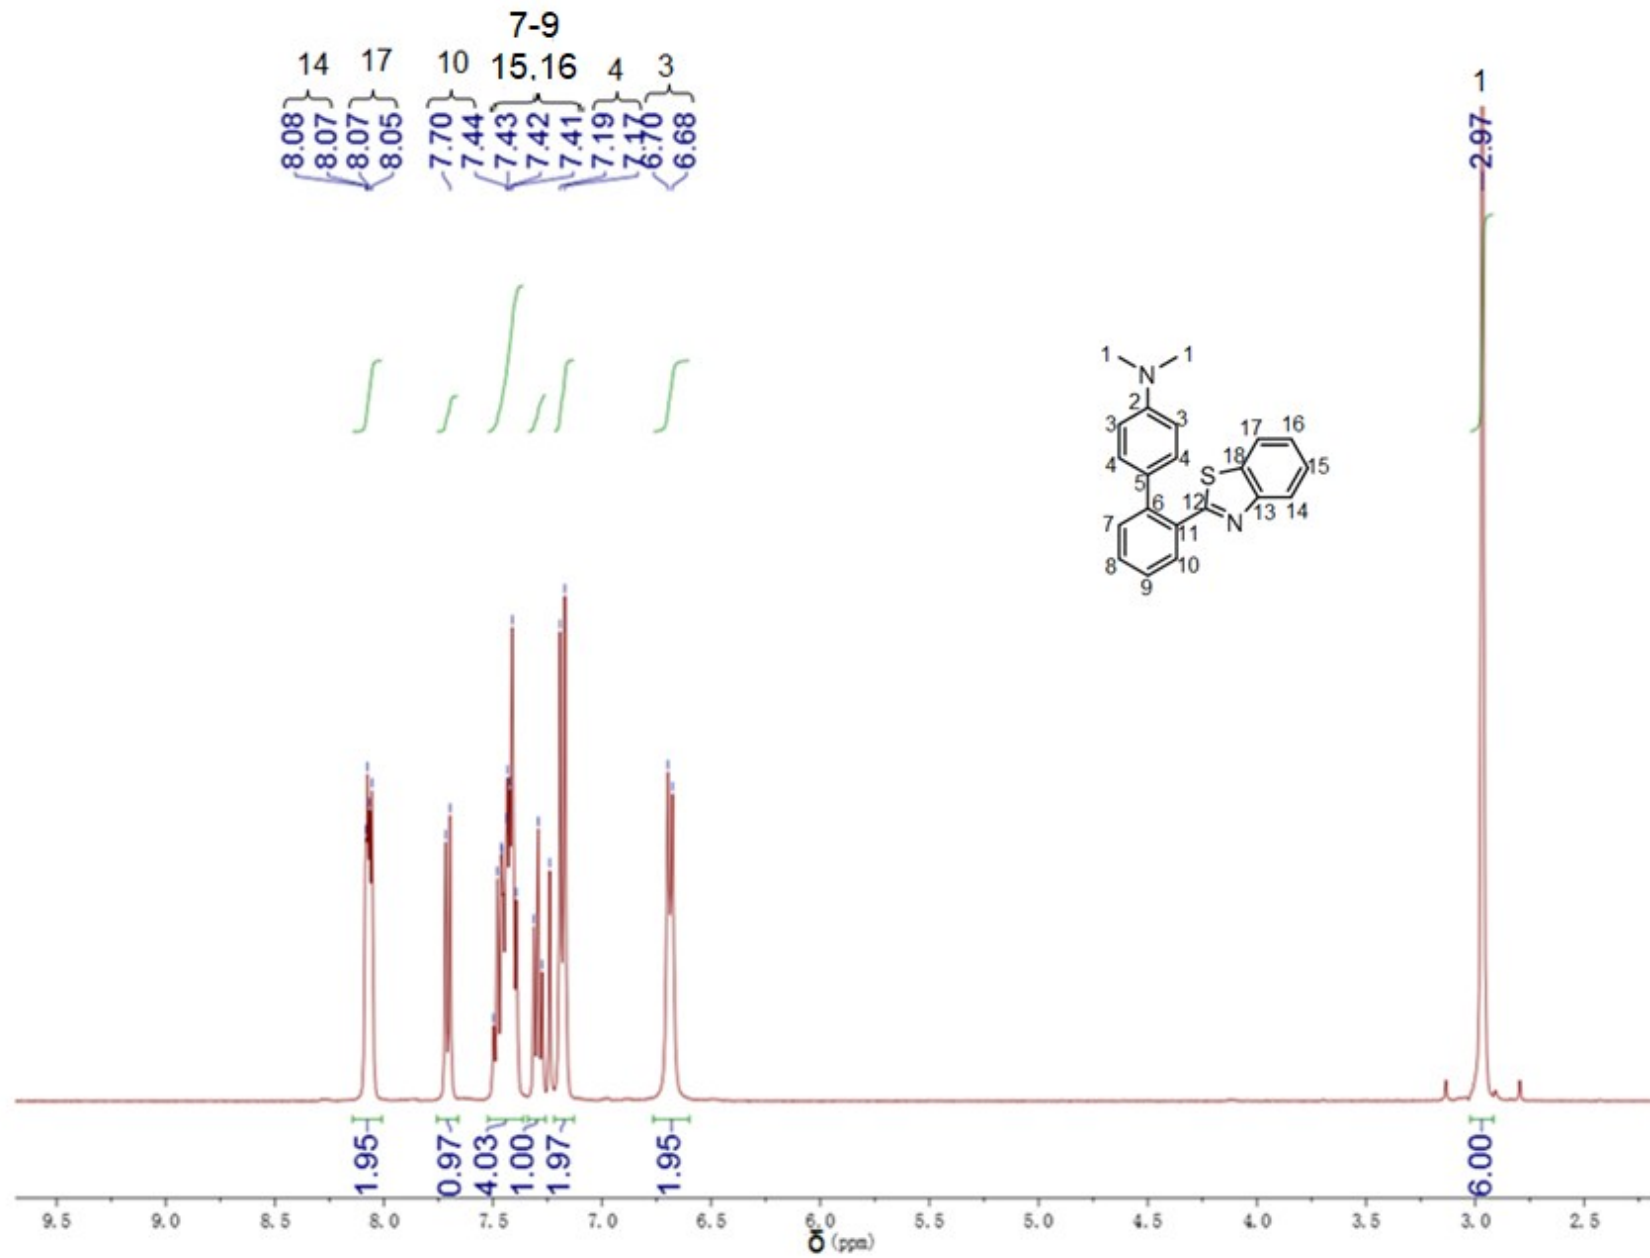

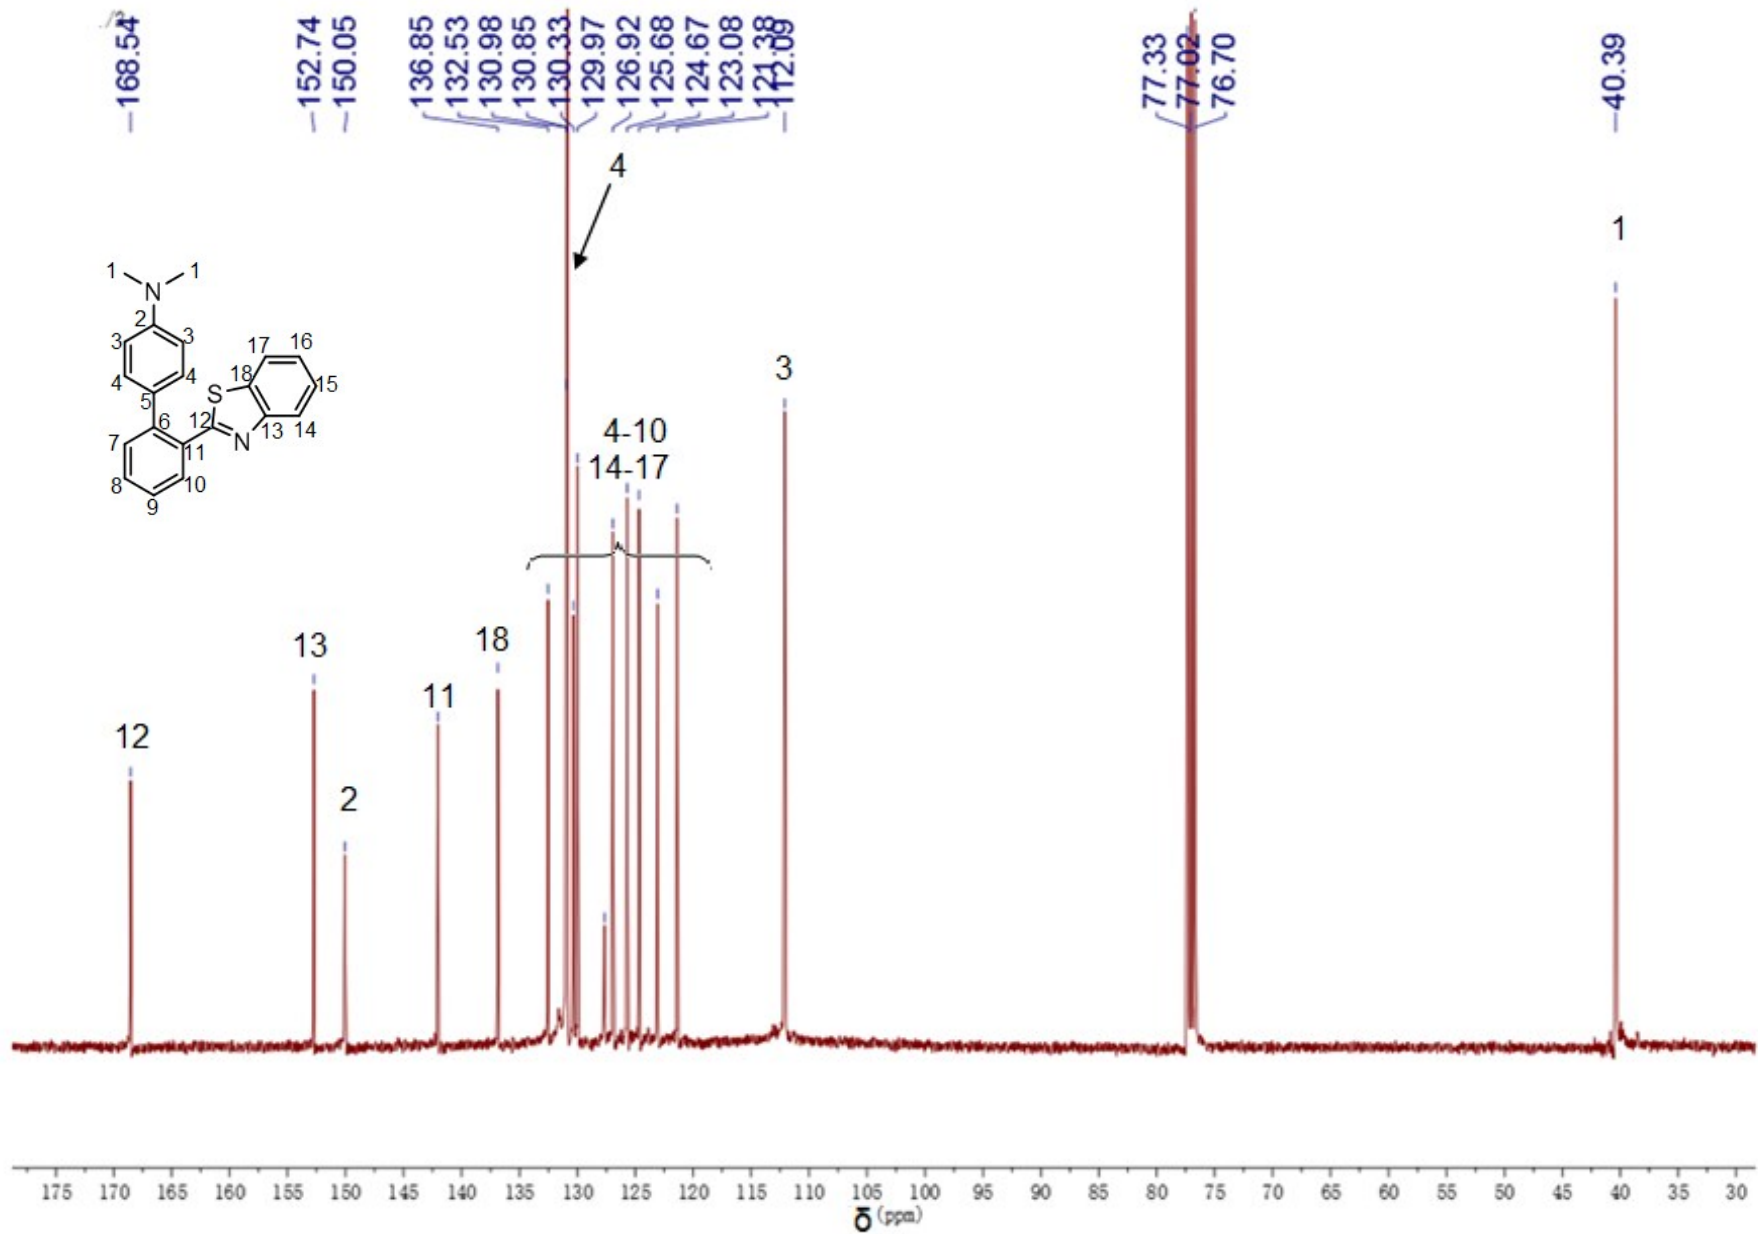

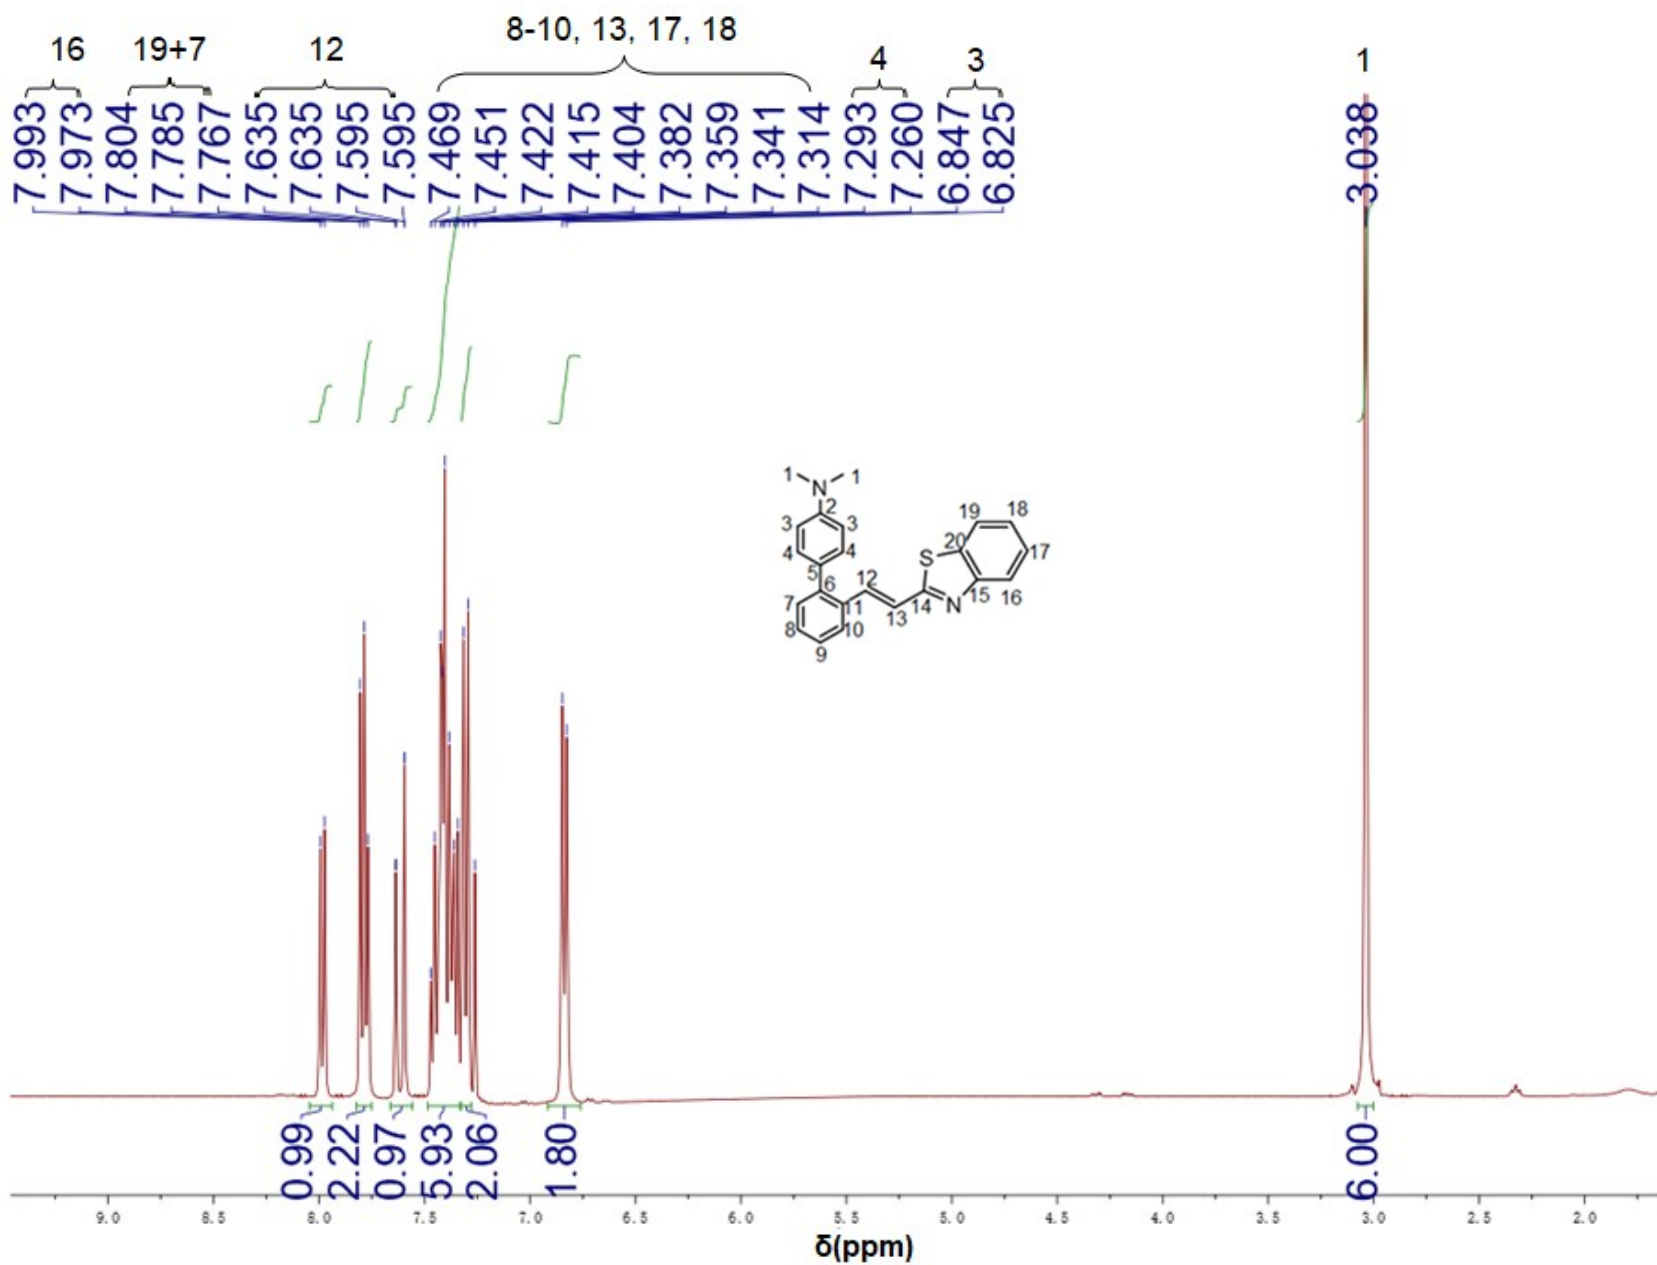



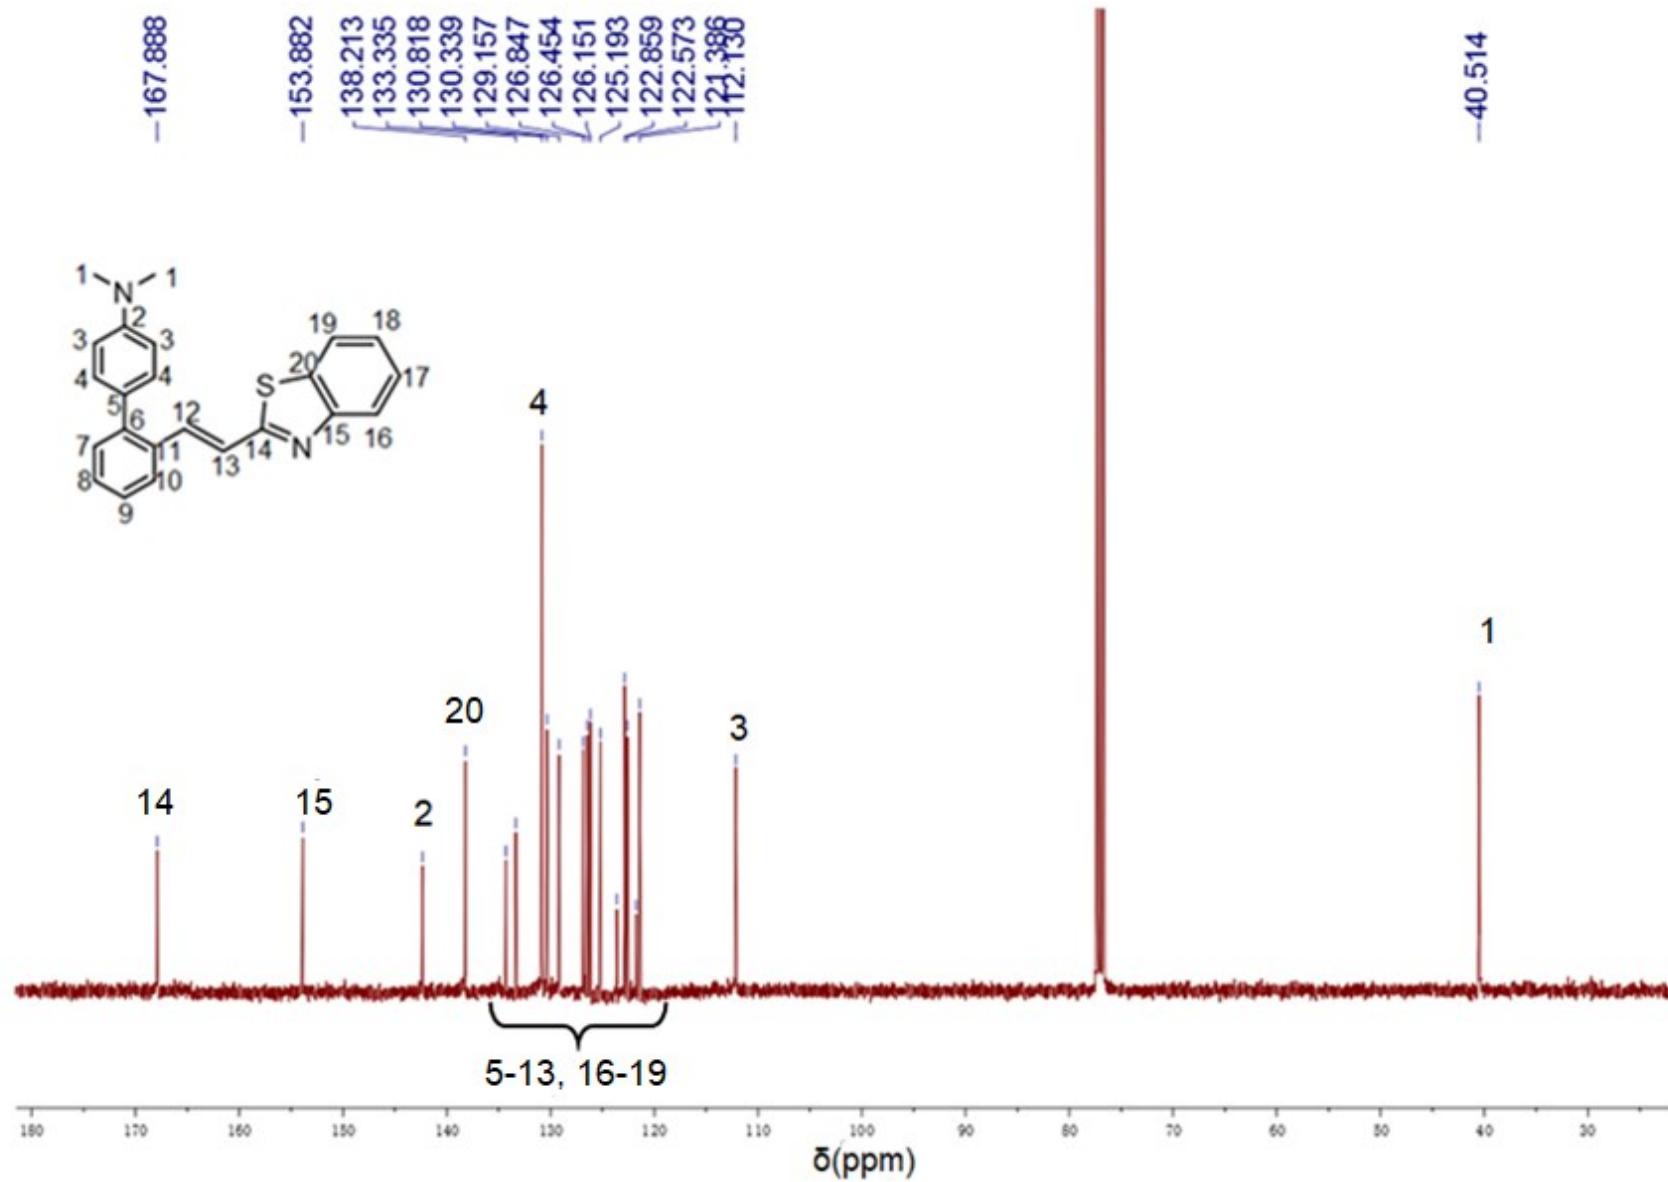

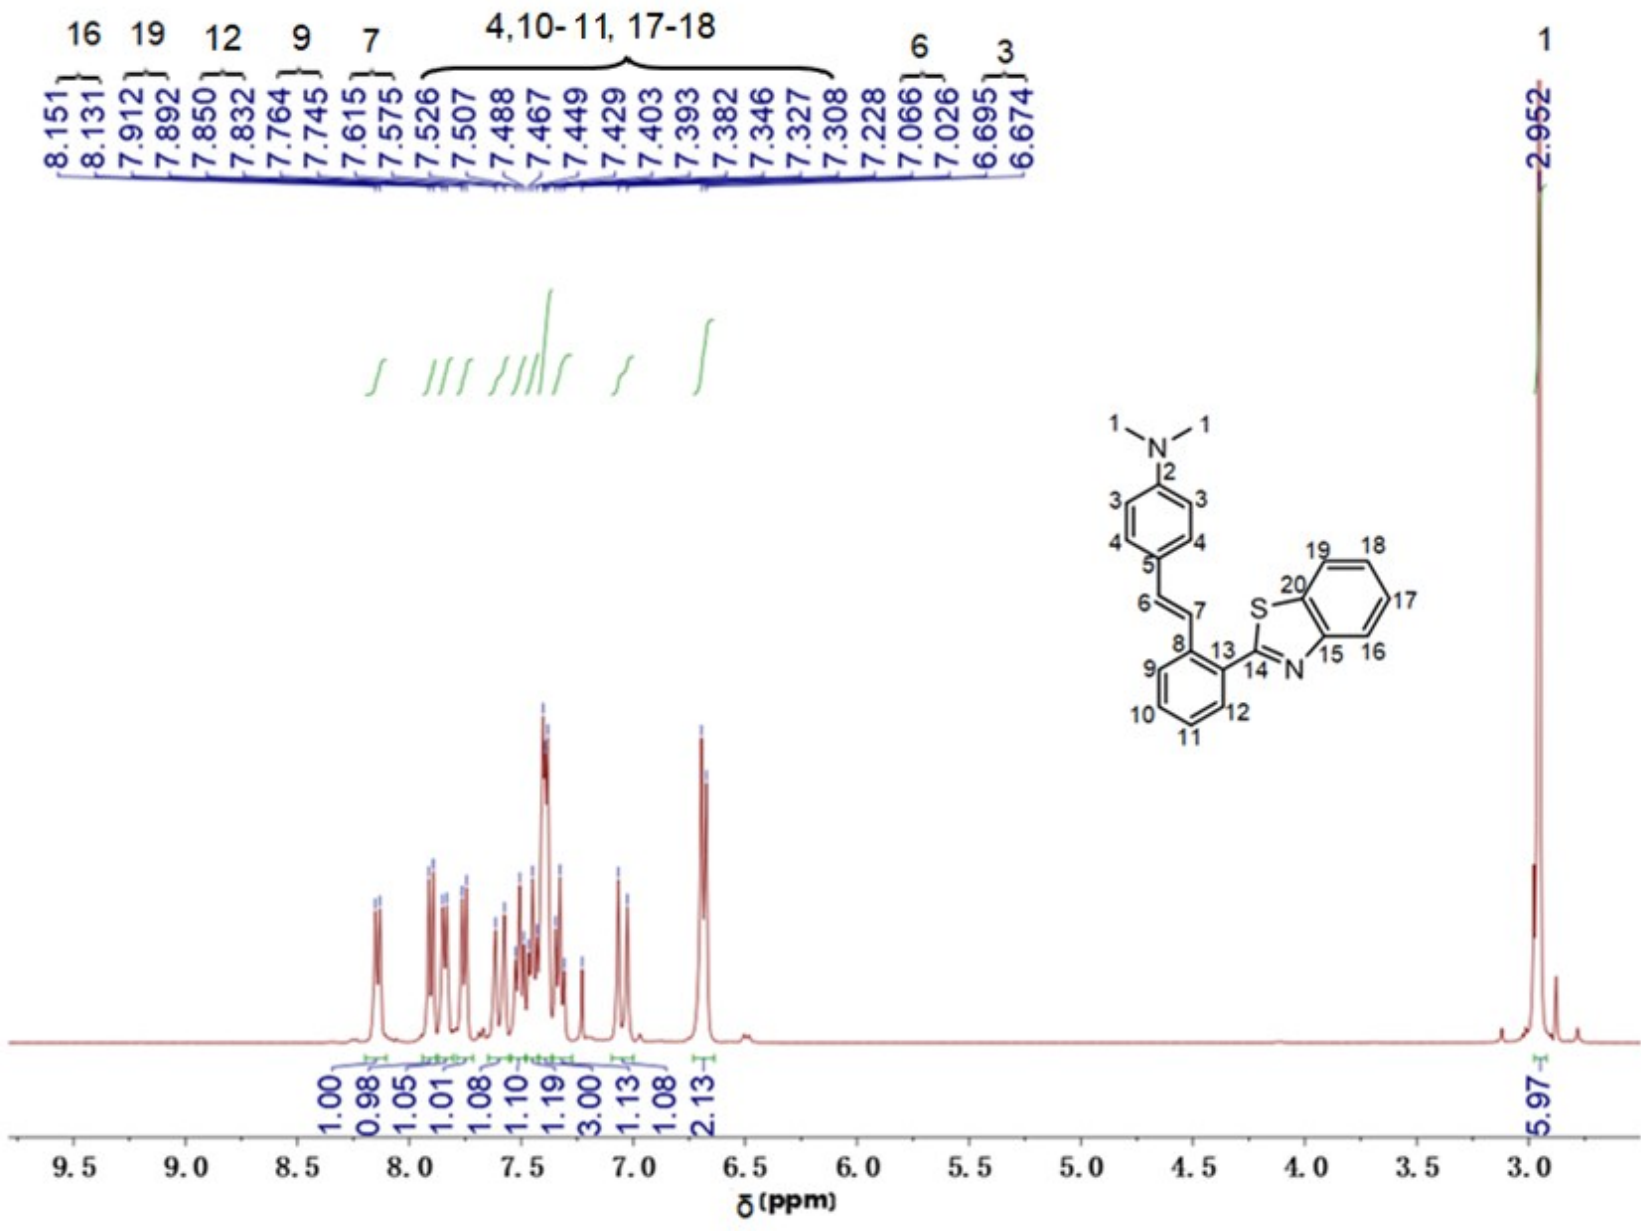

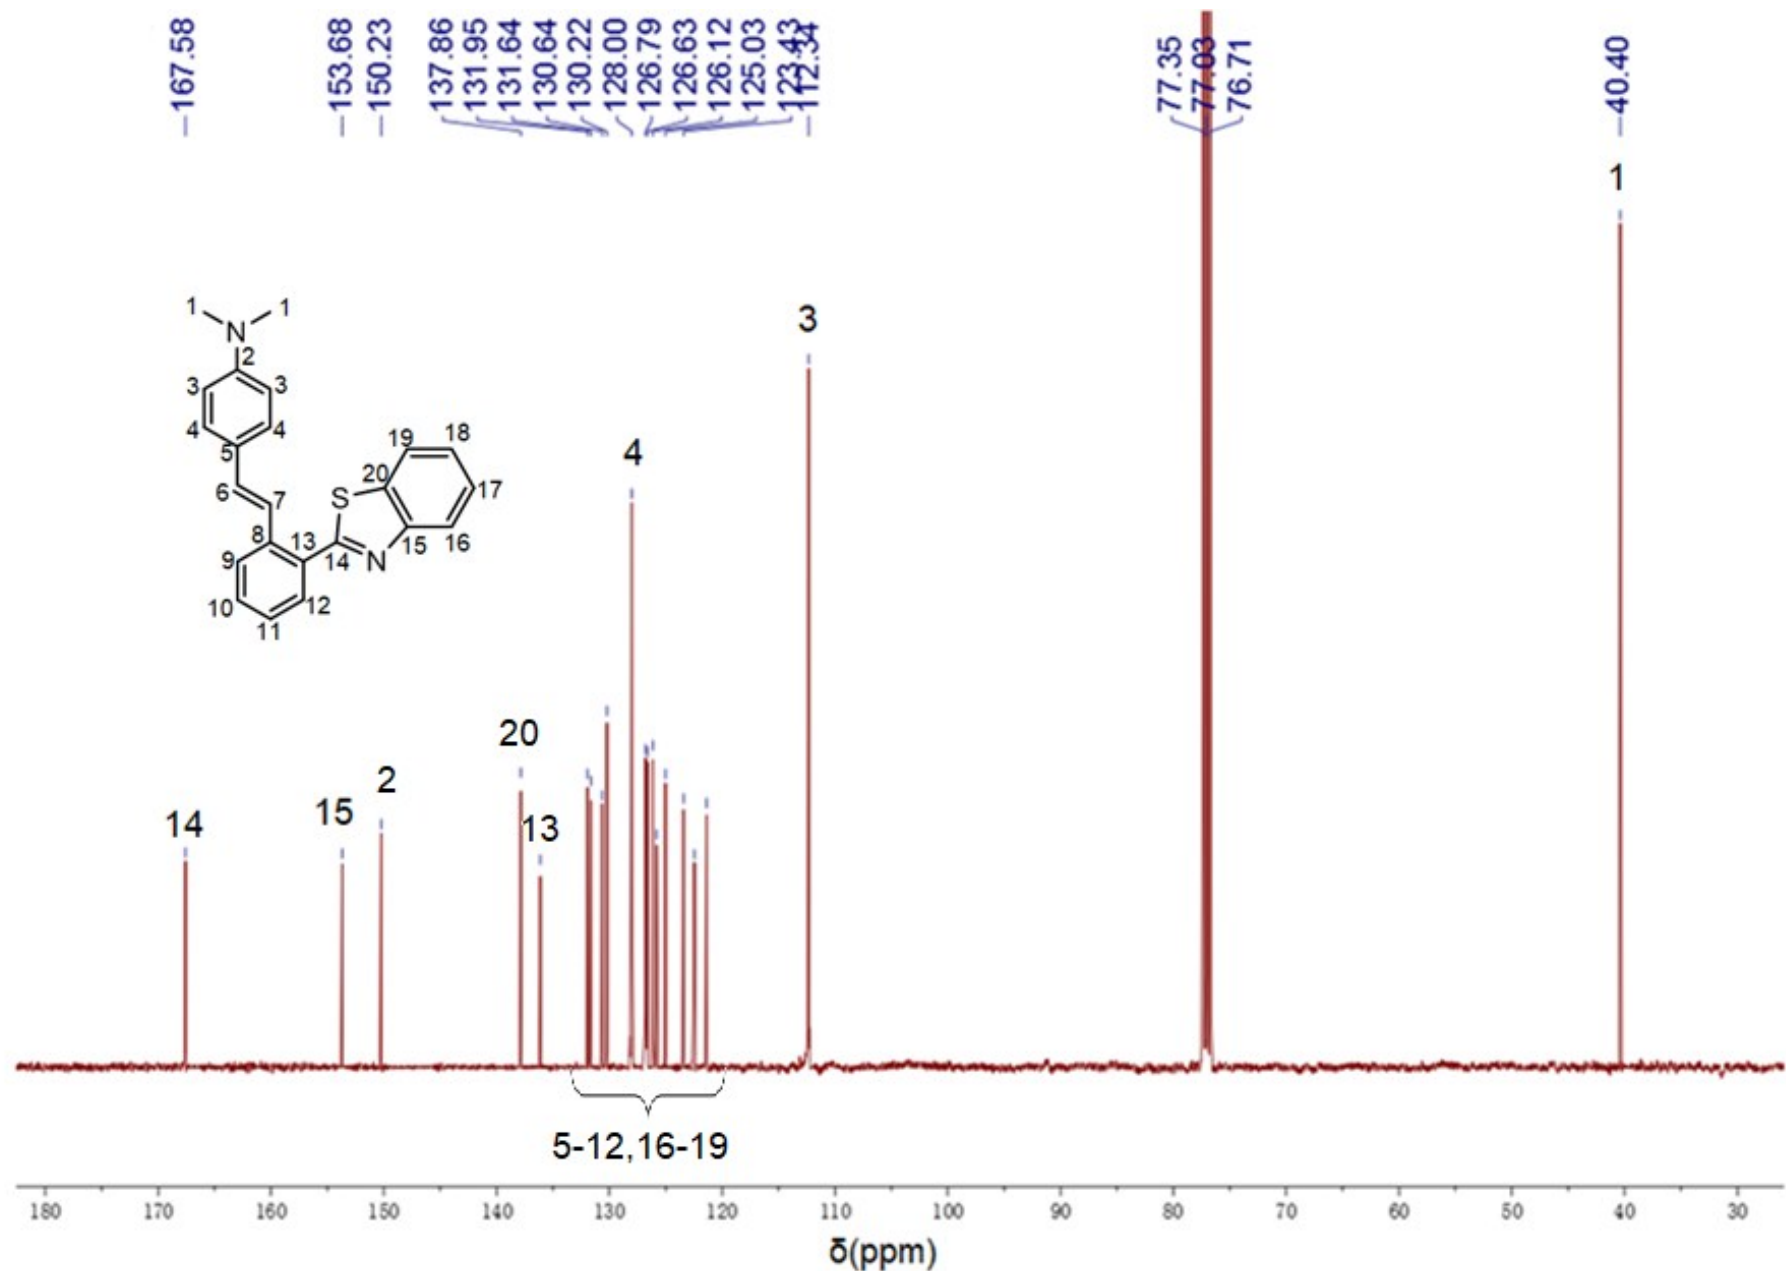

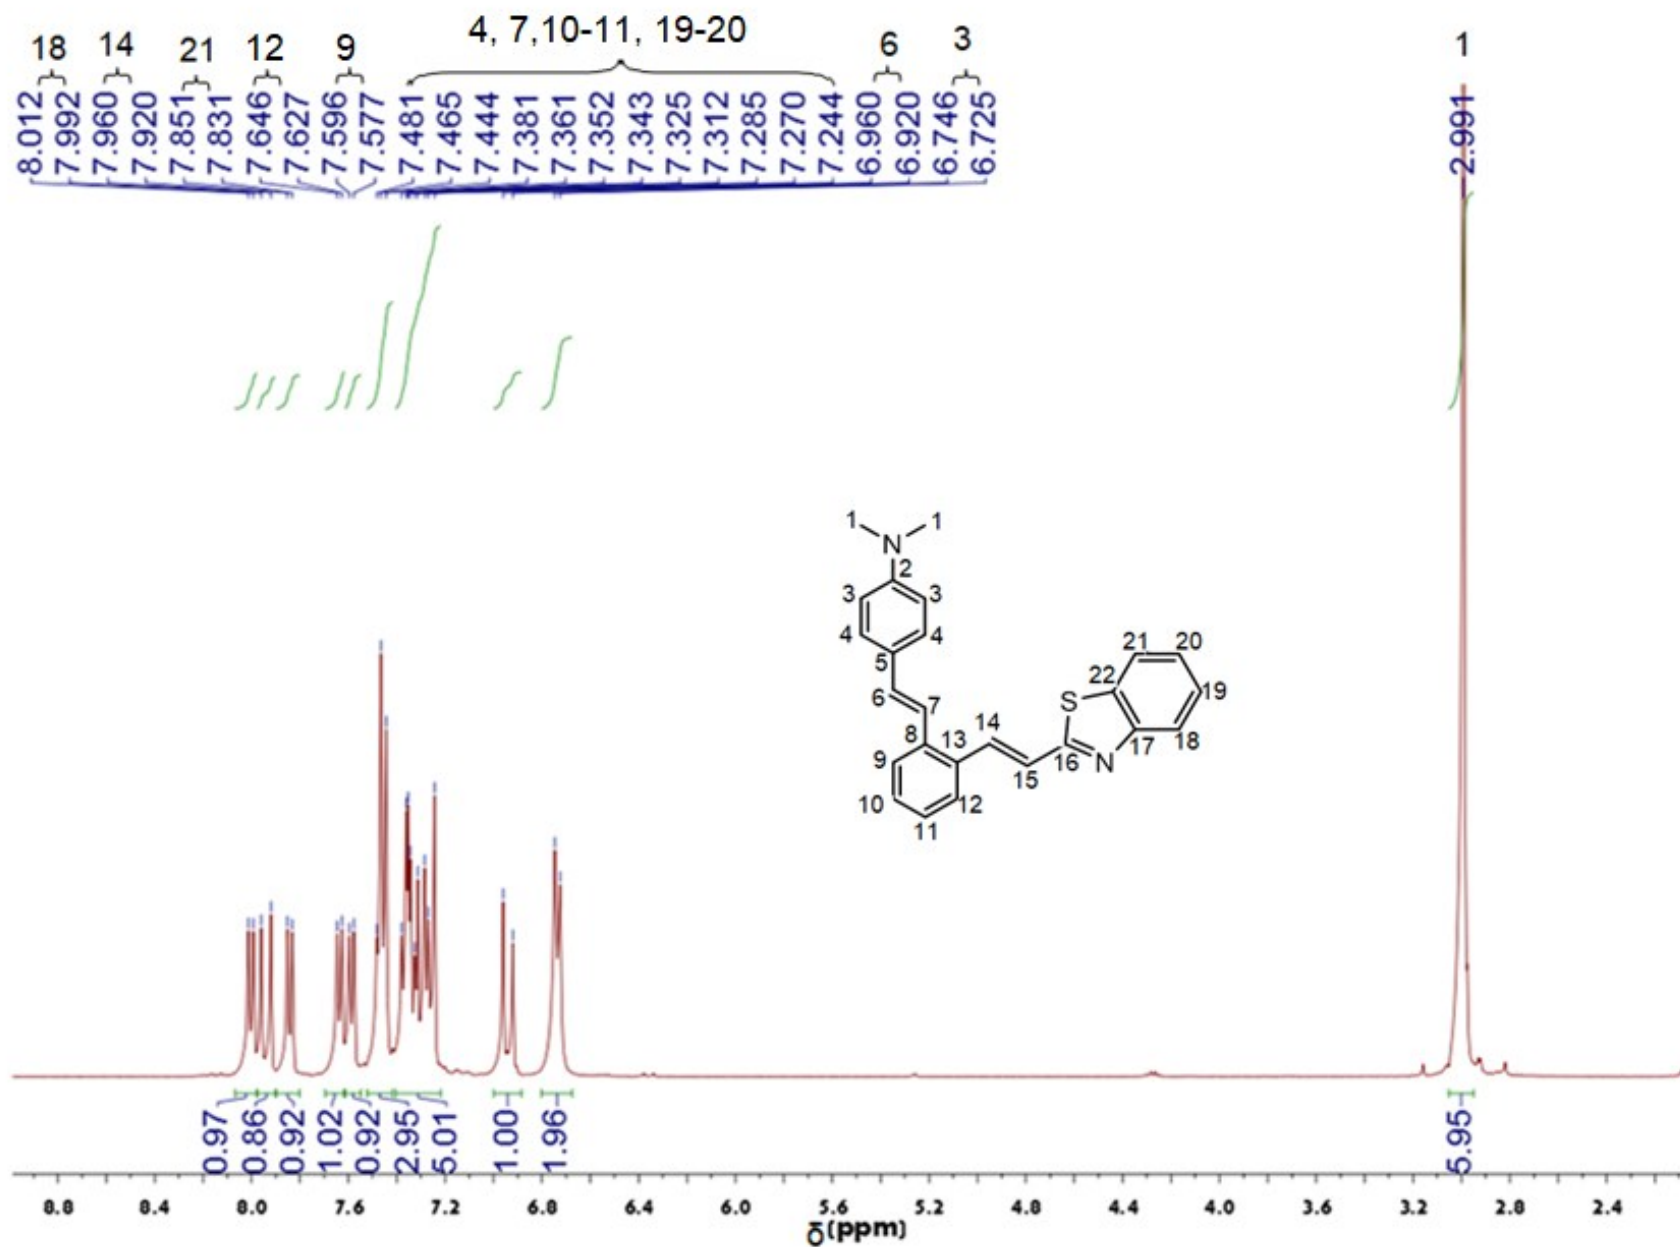

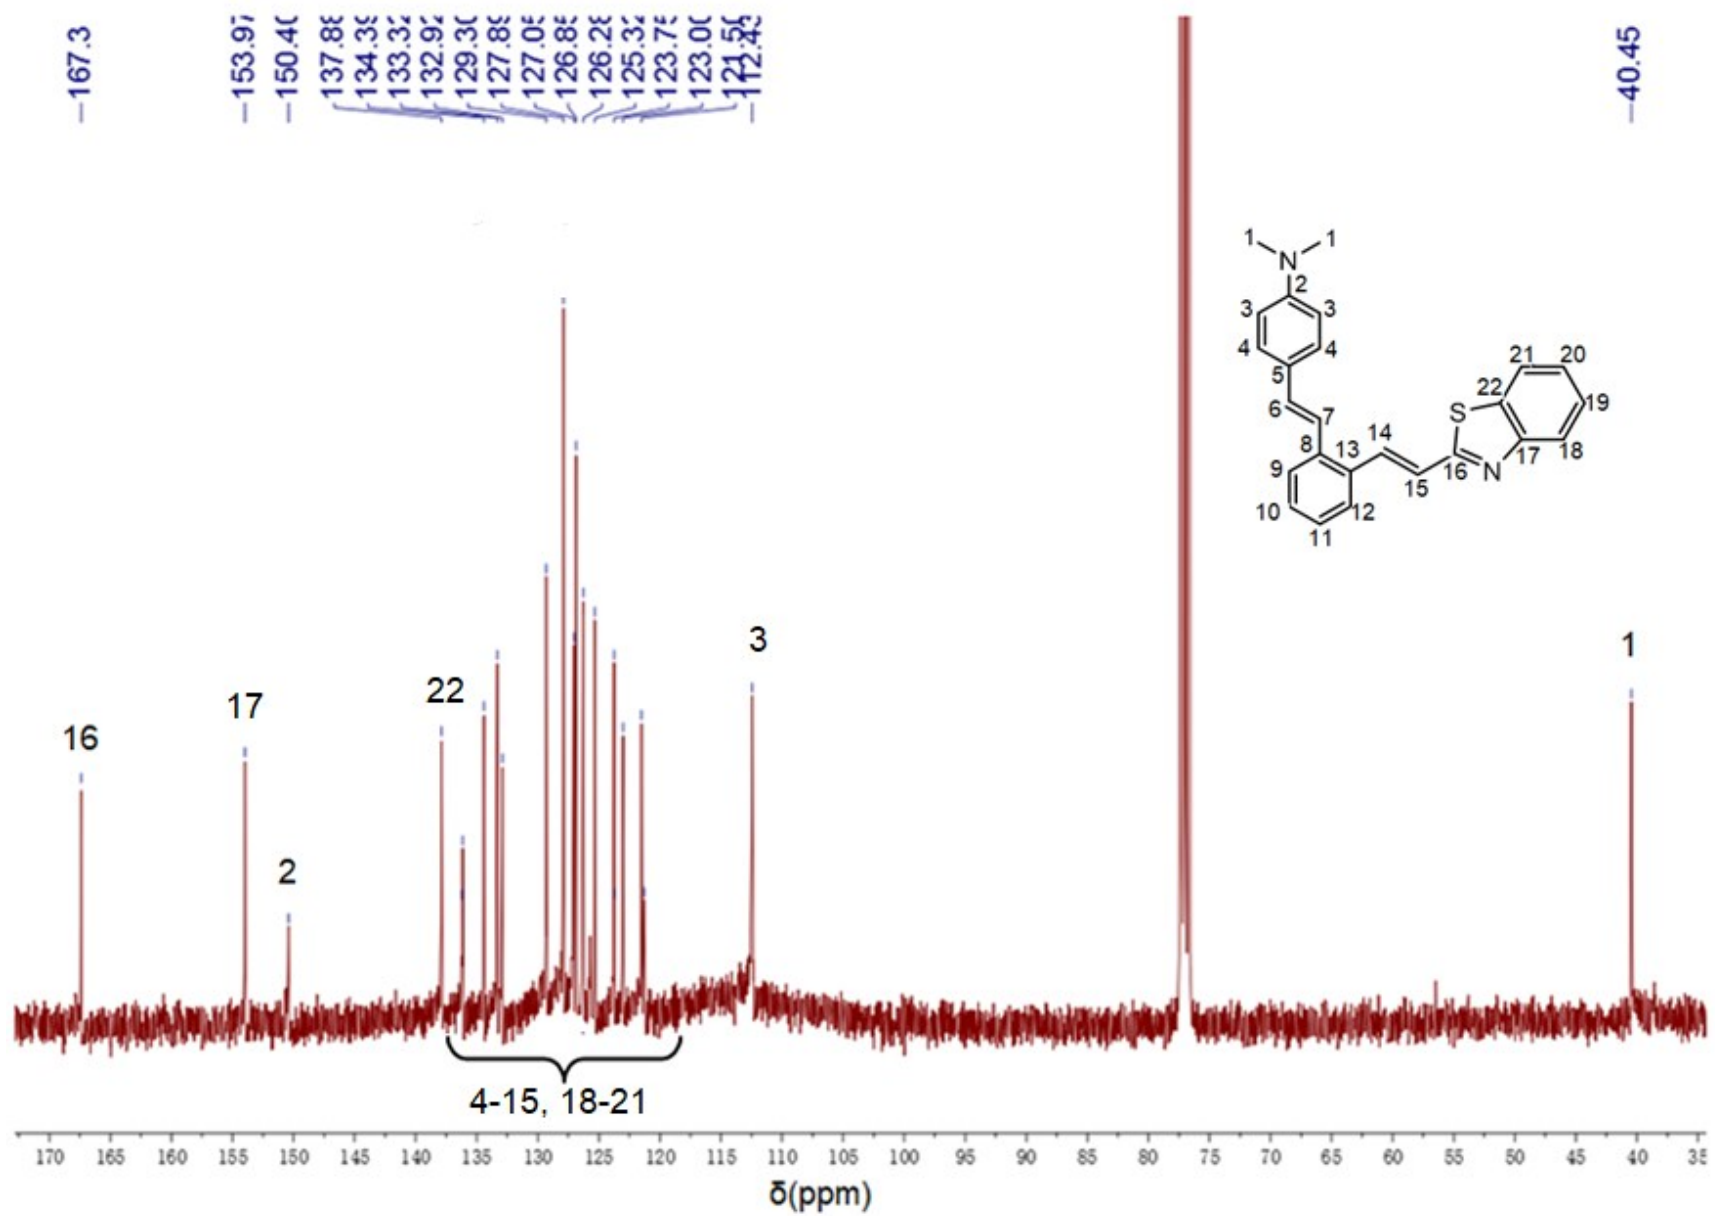

丰度

扫描 84 (0.781 分): 15121821.D\data.ms

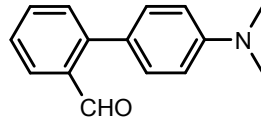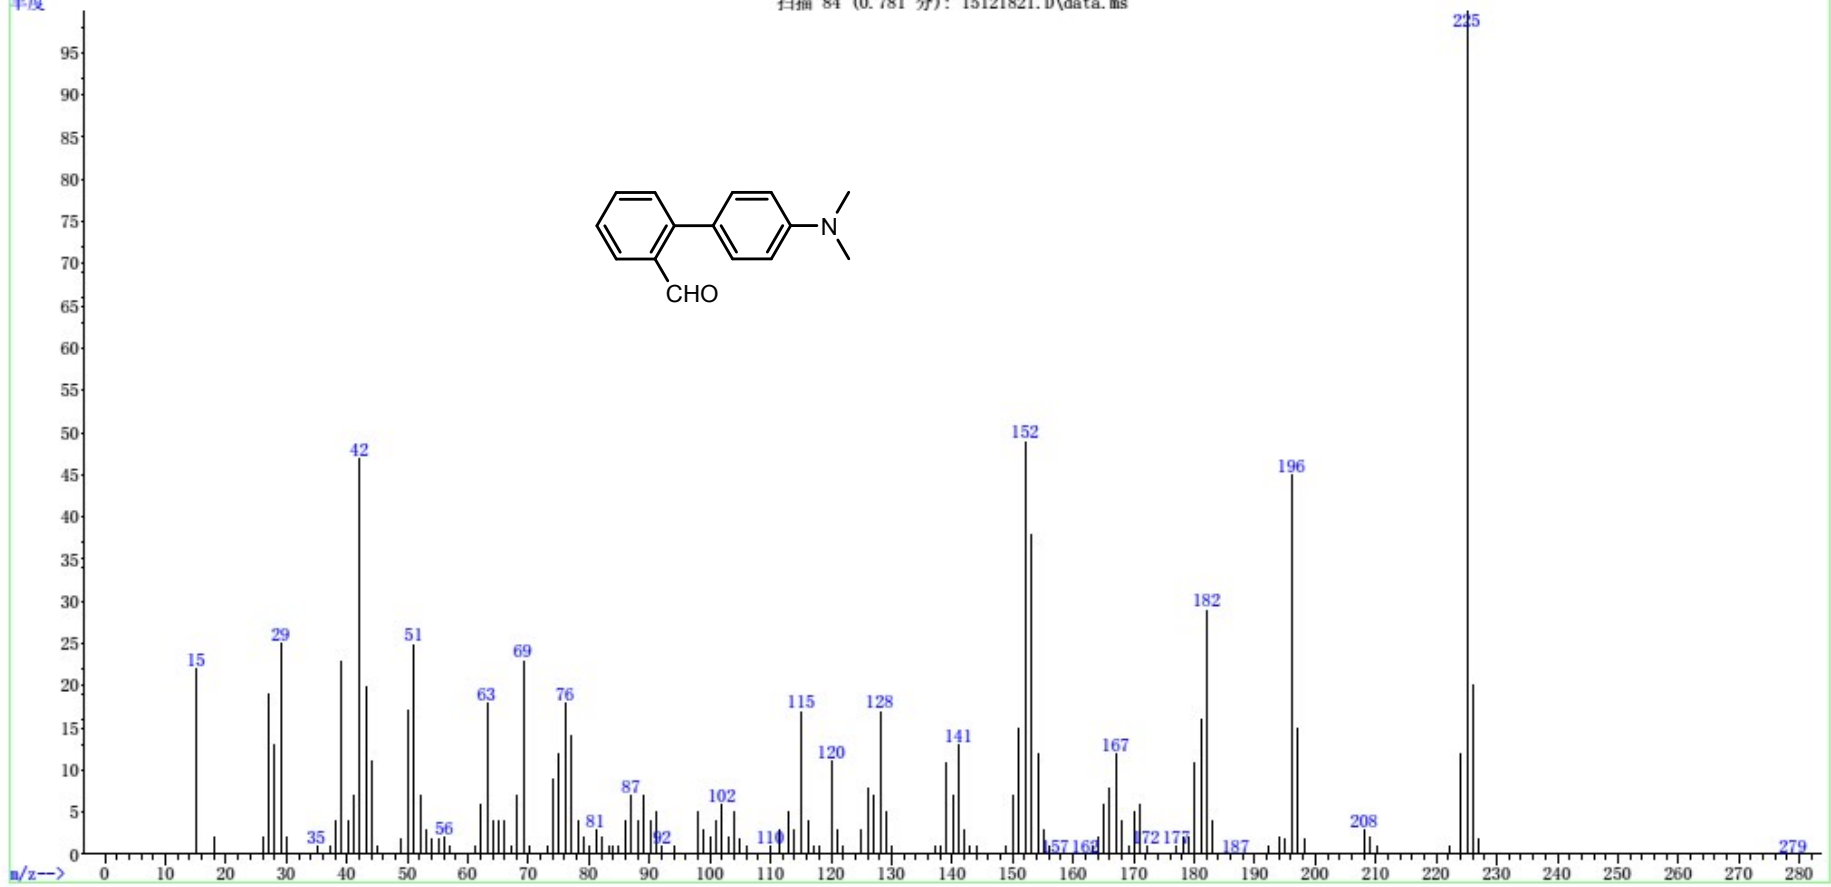

丰度

扫描 76 (0.884 分): 17050424.D\data.ms

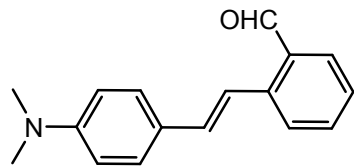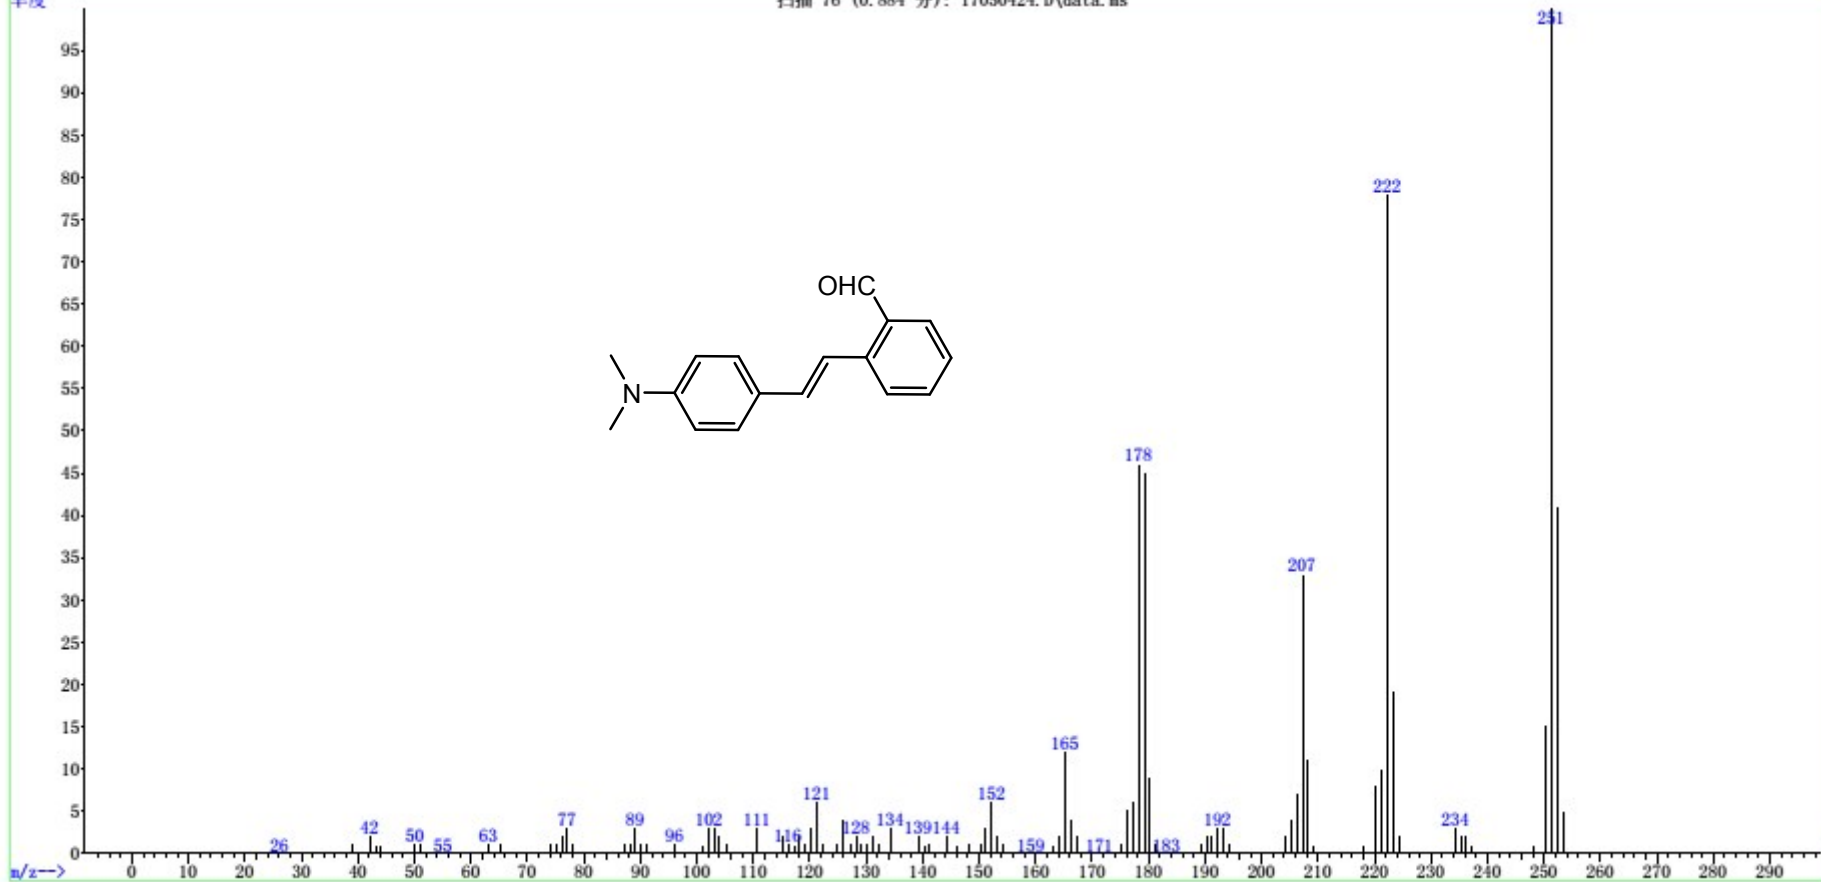

扫描 88 (0.995 分): 17050421.D\data.ms

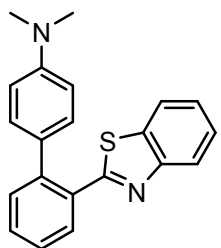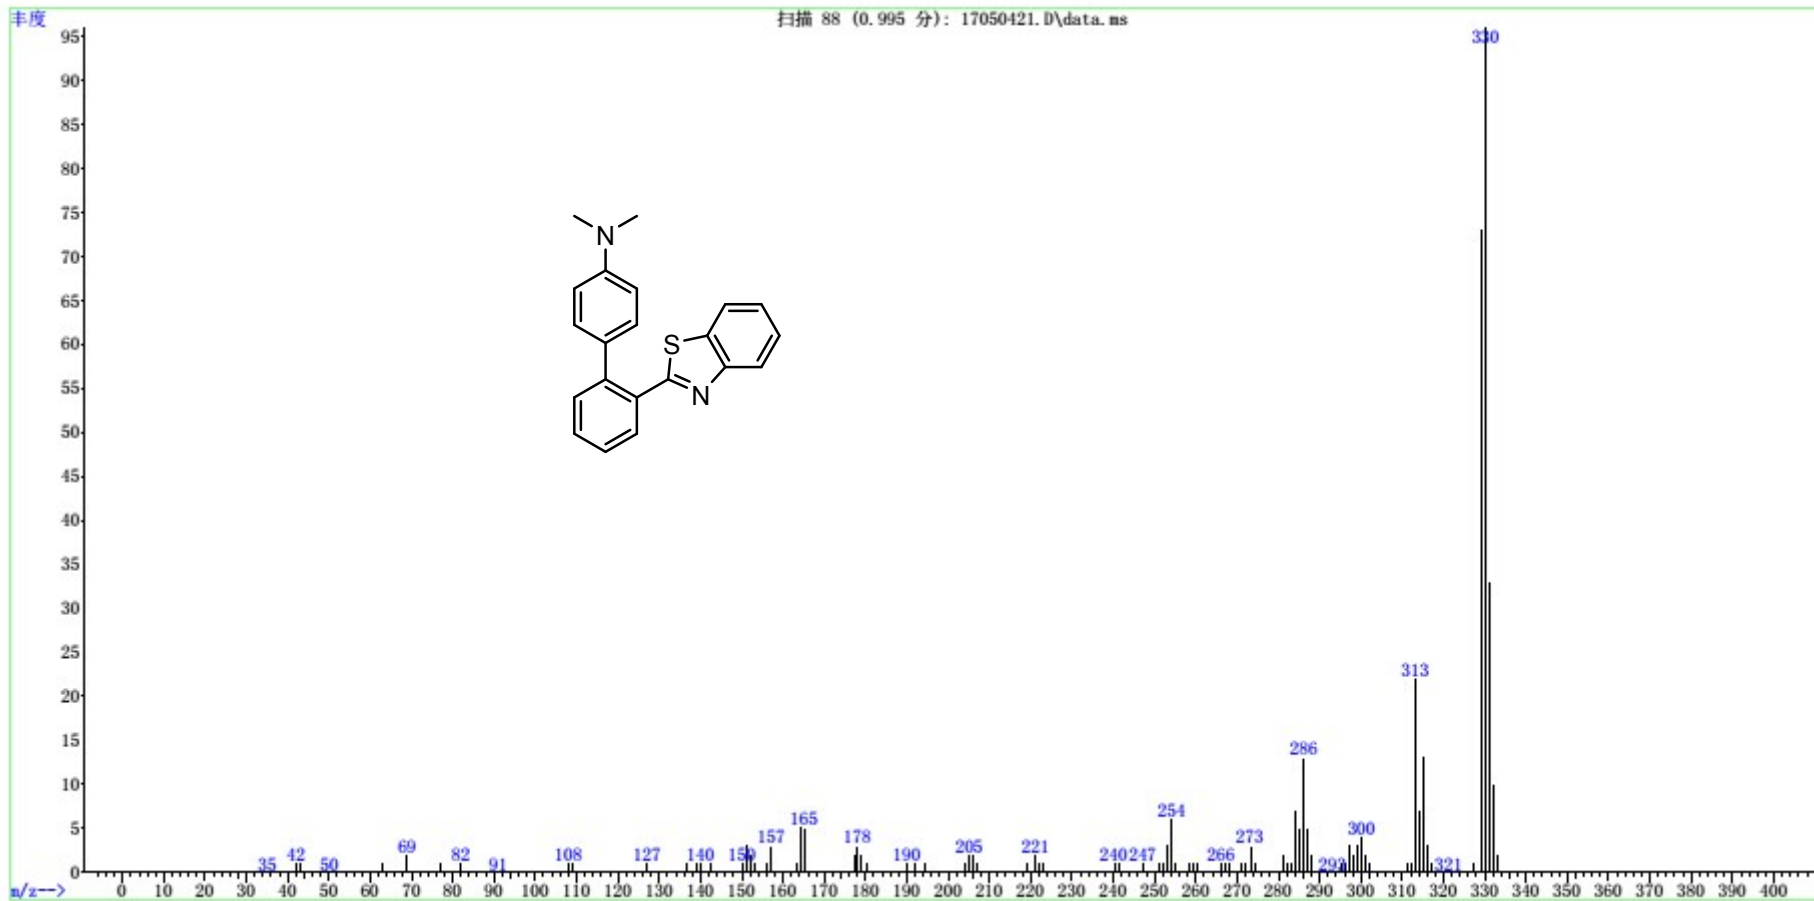



丰度

扫描 132 (1.125 分): 15121822.D\data.ms

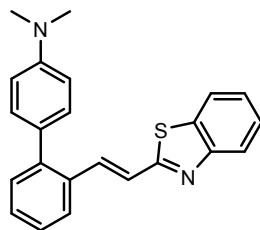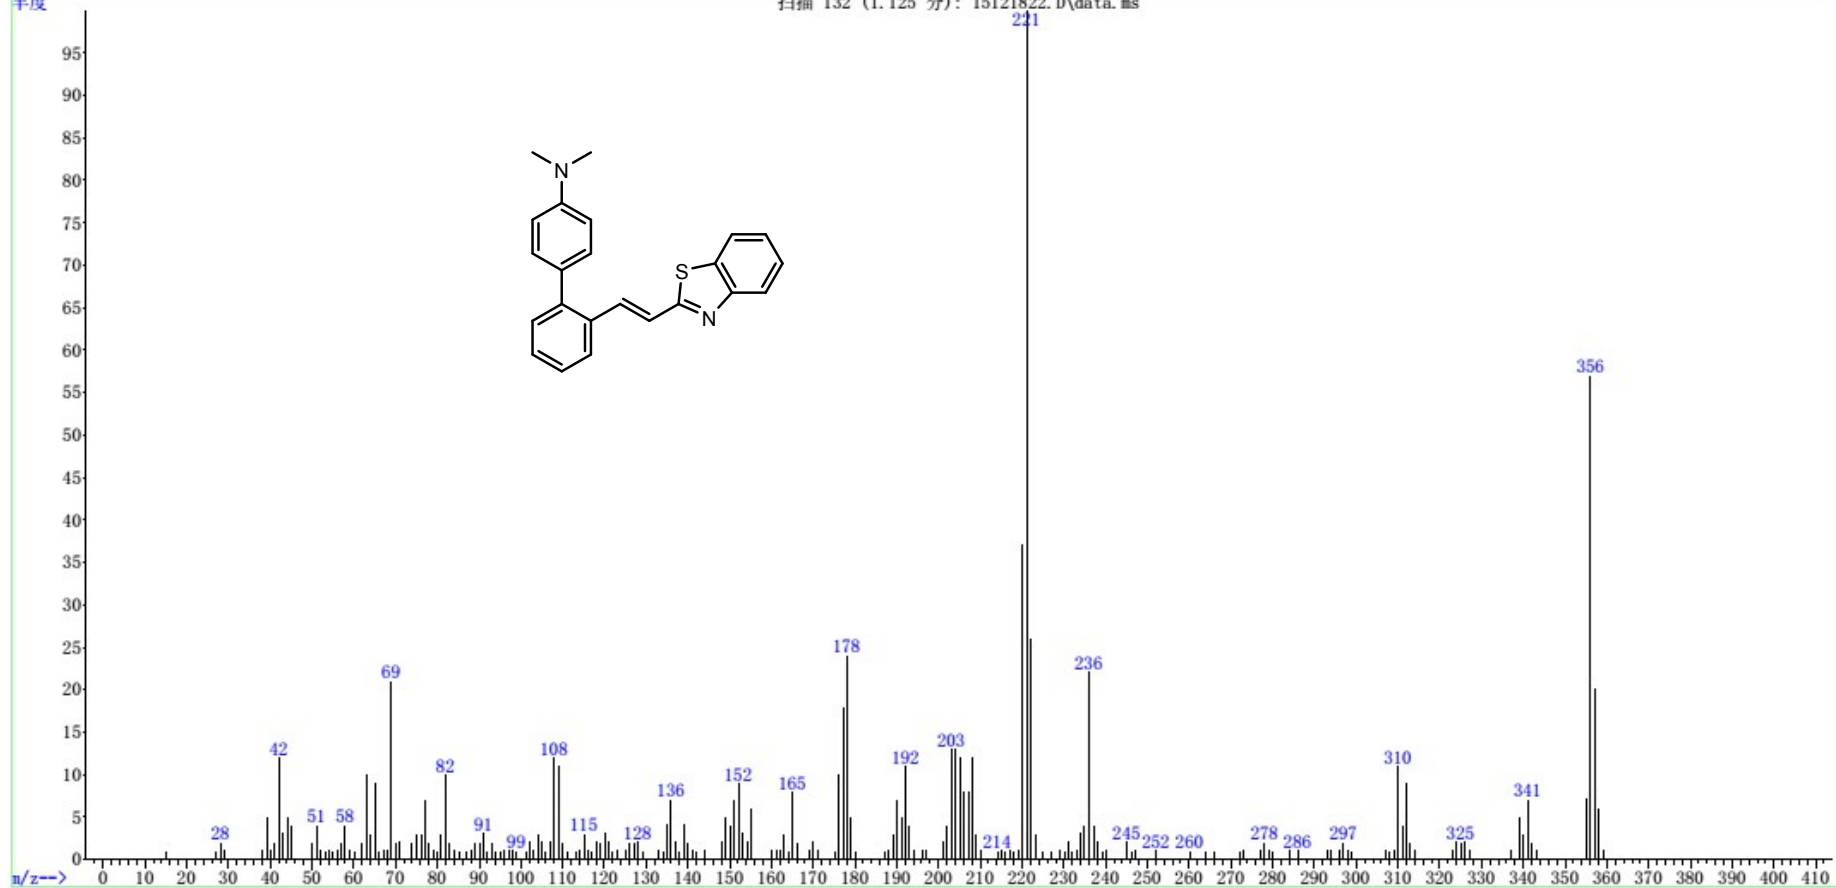

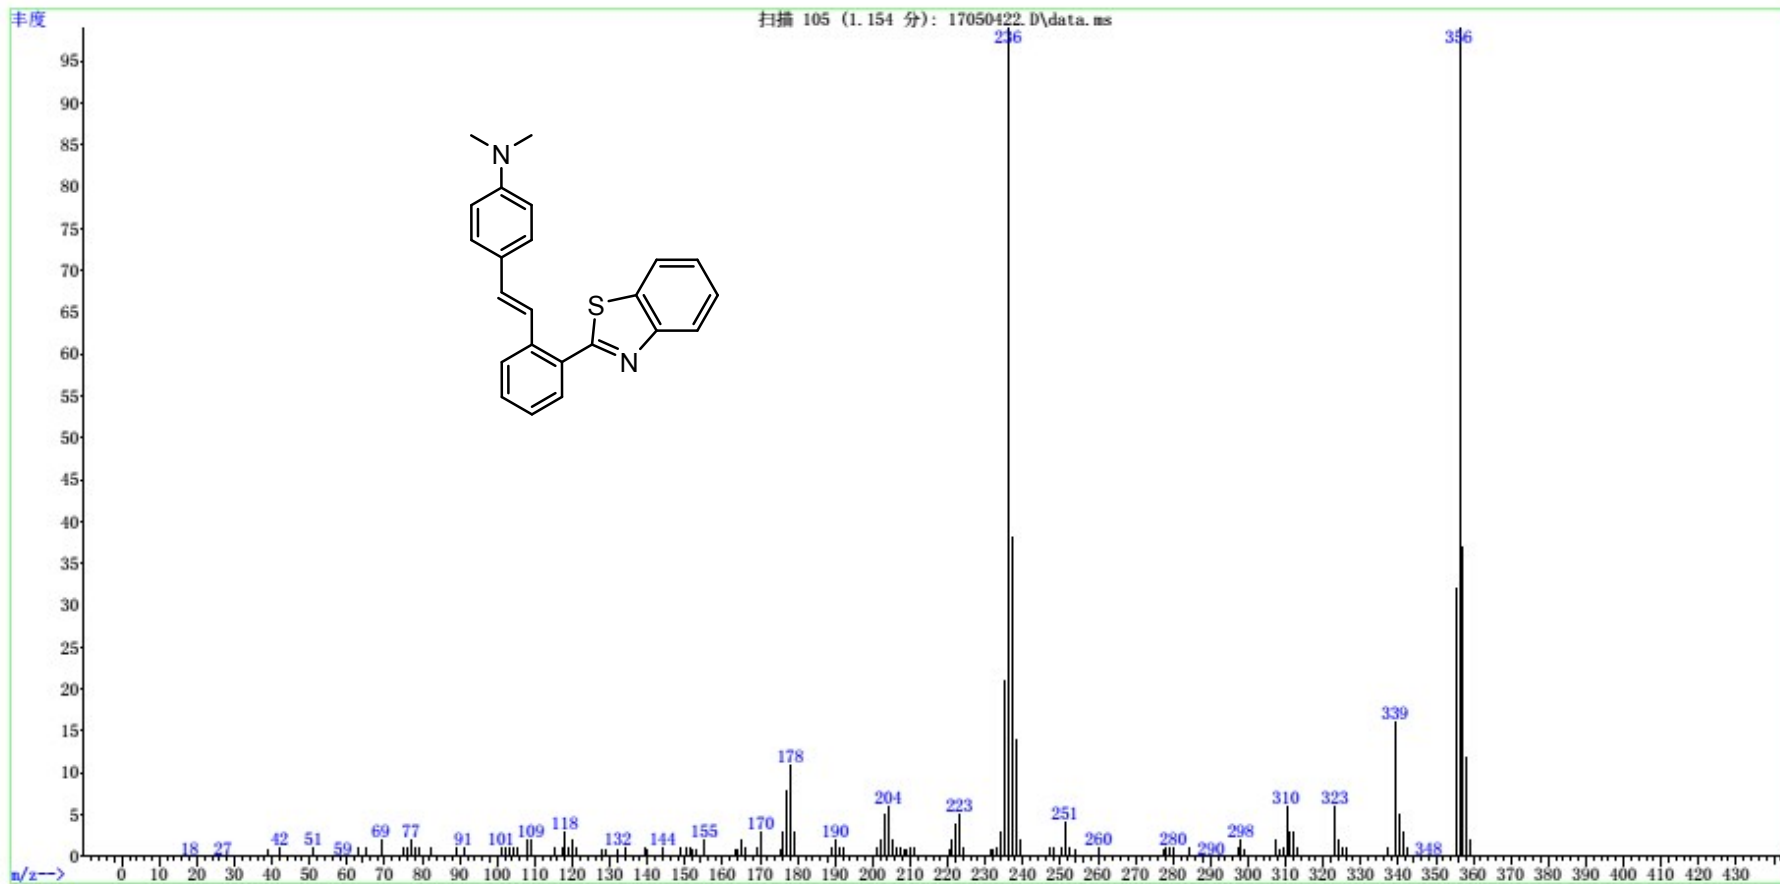

丰度

扫描 114 (1.237 分): 17050423.D\data.ms

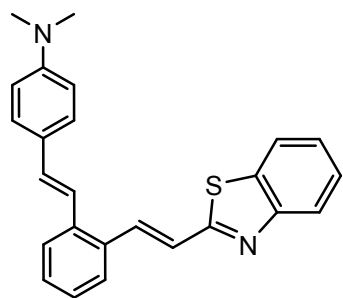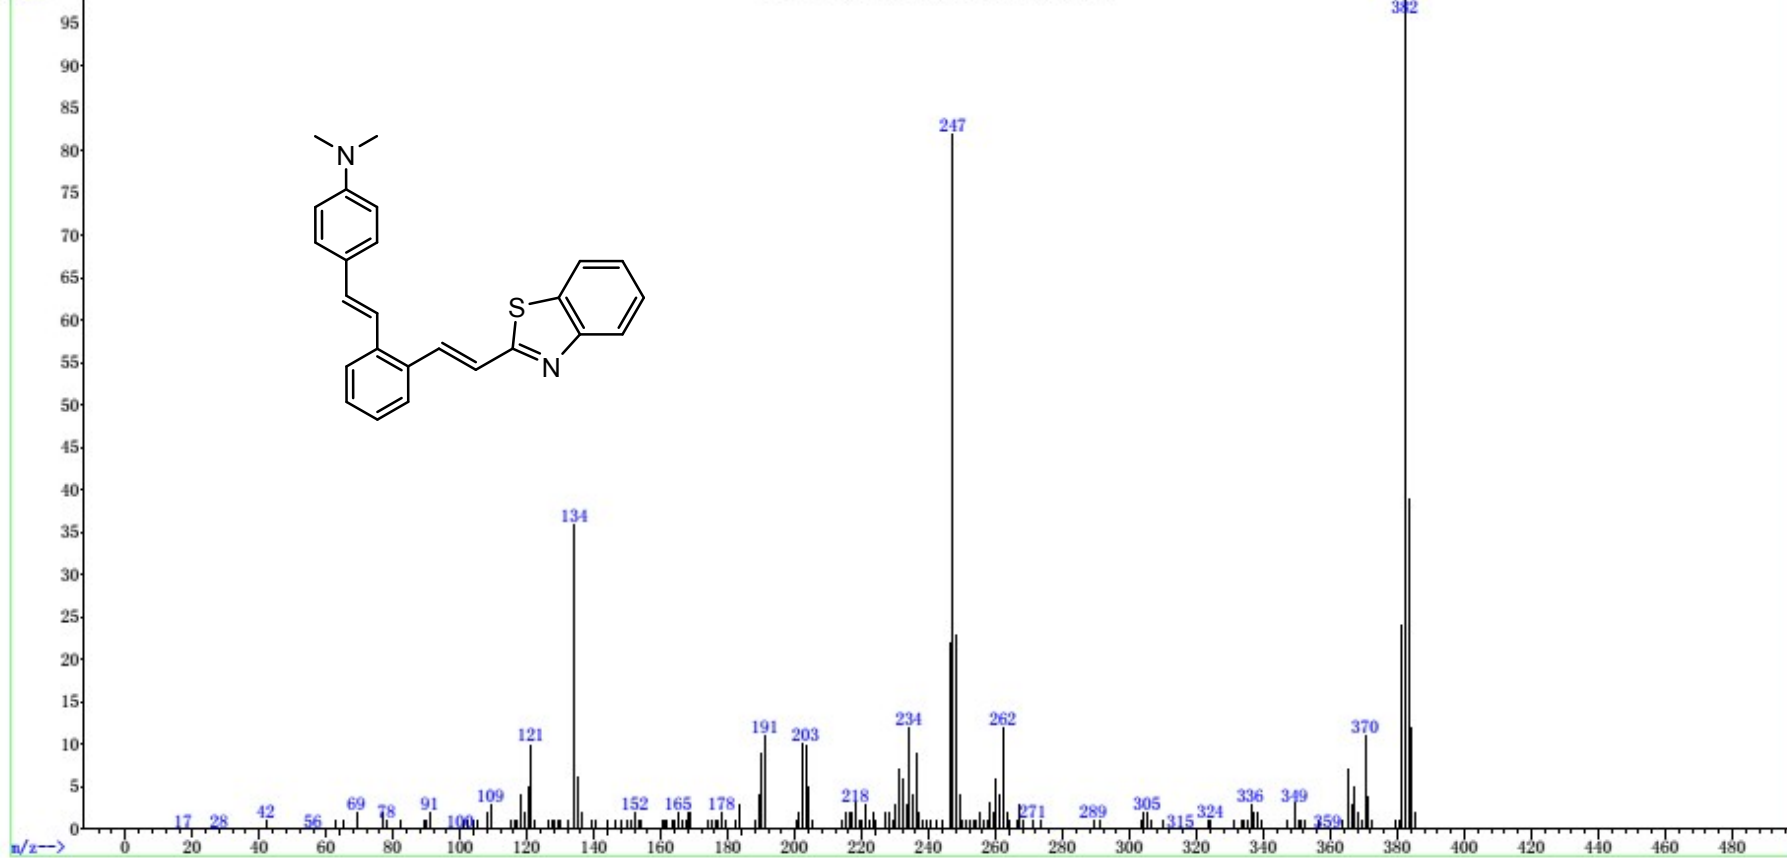

Supplement: c7ra10432d1.pdf [file c7ra10432d1.pdf]
